# Supplementary material for: Electrochemical oxidation of 4-substituted urazoles in the presence of arylsulfinic acids: an efficient method for the synthesis of new sulfonamide derivatives
Source: Royal Society of Chemistry journal article supplement (doi:10.1039/c2gc16342j), 2012-01-01

## Supporting Information

### **Electrochemical oxidation of 4-substituted urazoles in the presence of arylsulfonic acids. A green method for the synthesis of new sulfonamide derivatives**

**F. Varmaghani<sup>†</sup>, D. Nematollahi<sup>†\*</sup>, S. Mallakpour<sup>‡</sup> and R. Esmaili<sup>†</sup>**

<sup>†</sup>*Faculty of Chemistry, Bu-Ali-Sina University, Hamedan 65178-38683, I. R. Iran*

[nemat@basu.ac.ir](mailto:nemat@basu.ac.ir)

<sup>‡</sup>*Organic Polymer Chemistry Research Laboratory, Department of Chemistry, Isfahan University of Technology, Isfahan 84156-83111, I. R. Iran*

To whom correspondence should be addressed. Fax: 0098 - 811- 8257407, Phone: 0098 - 811- 8282807

## Table of Contents:

|                                                 |         |
|-------------------------------------------------|---------|
| <sup>1</sup> H NMR spectrum of <b>5a</b> .....  | S1-S3   |
| <sup>13</sup> C NMR spectrum of <b>5a</b> ..... | S4      |
| FT-IR spectrum of <b>5a</b> .....               | S5      |
| <sup>1</sup> H NMR spectrum of <b>5b</b> .....  | S6      |
| <sup>13</sup> C NMR spectrum of <b>5b</b> ..... | S7      |
| FT-IR spectrum of <b>5b</b> .....               | S8      |
| <sup>1</sup> H NMR spectrum of <b>5c</b> .....  | S9      |
| <sup>13</sup> C NMR spectrum of <b>5c</b> ..... | S10     |
| FT-IR spectrum of <b>5c</b> .....               | S11     |
| <sup>1</sup> H NMR spectrum of <b>5d</b> .....  | S12-S14 |
| <sup>13</sup> C NMR spectrum of <b>5d</b> ..... | S15     |
| FT-IR spectrum of <b>5d</b> .....               | S16     |
| <sup>1</sup> H NMR spectrum of <b>5e</b> .....  | S17-S19 |
| <sup>13</sup> C NMR spectrum of <b>5e</b> ..... | S20     |
| FT-IR spectrum of <b>5e</b> .....               | S21     |
| <sup>1</sup> H NMR spectrum of <b>5f</b> .....  | S22-S24 |
| <sup>13</sup> C NMR spectrum of <b>5f</b> ..... | S25     |
| FT-IR spectrum of <b>5f</b> .....               | S26     |

<sup>1</sup>H NMR spectrum of **5a**

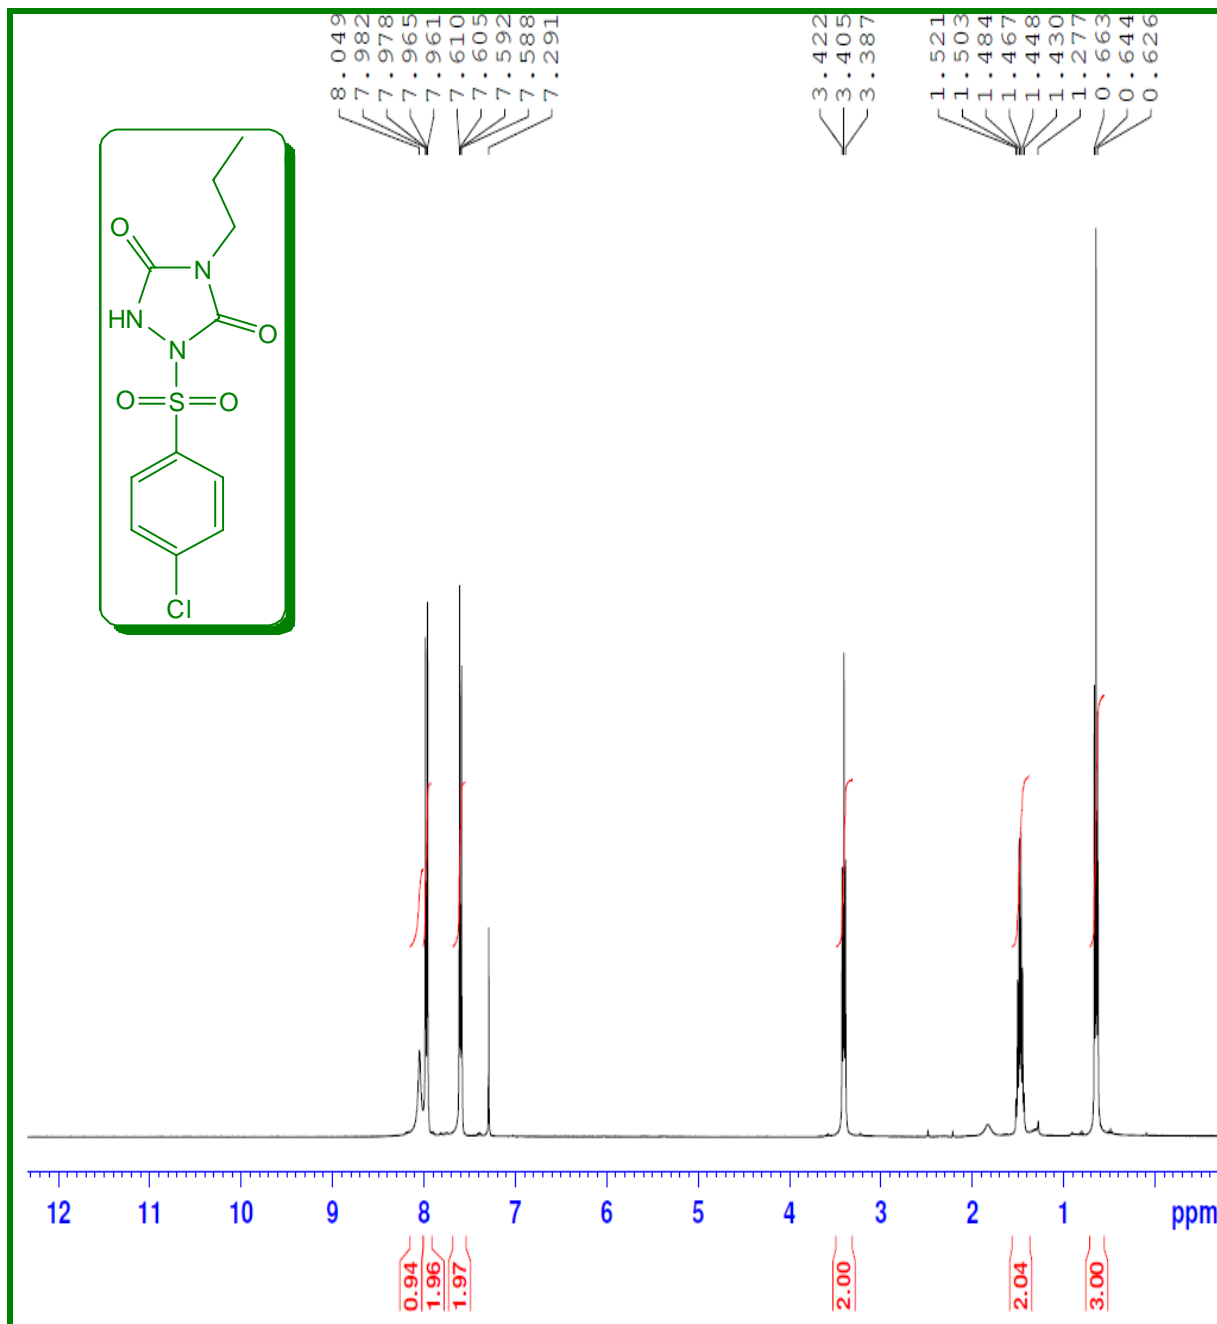

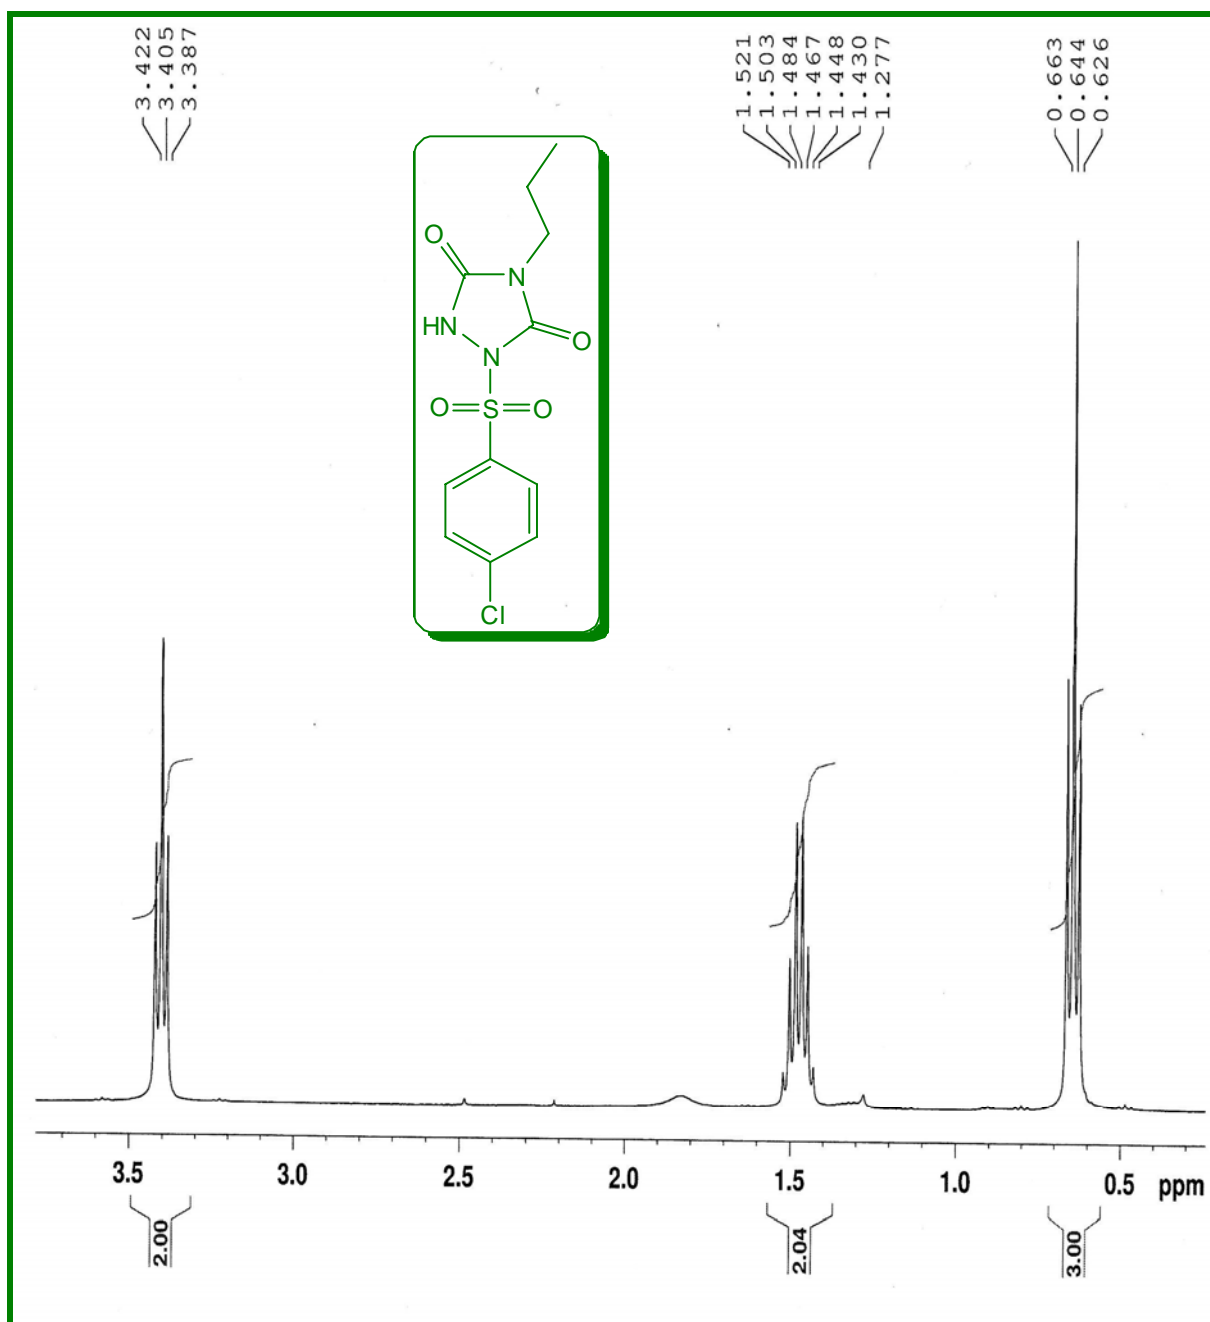

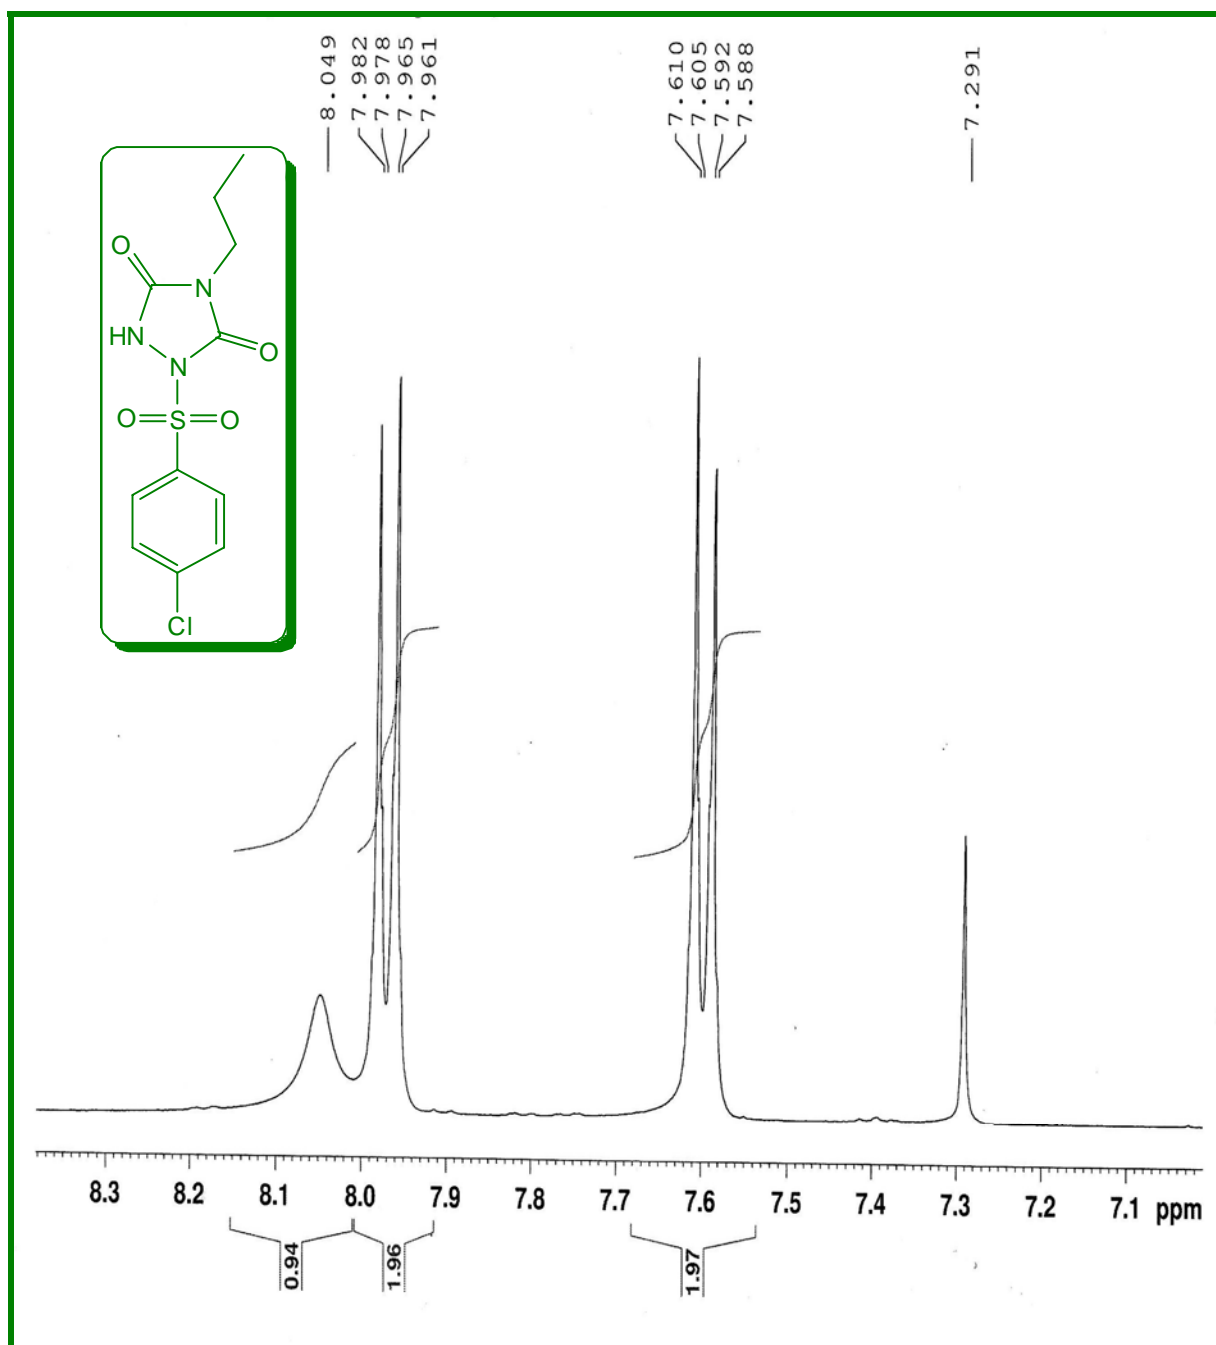

$^{13}\text{C}$  NMR spectrum of **5a**

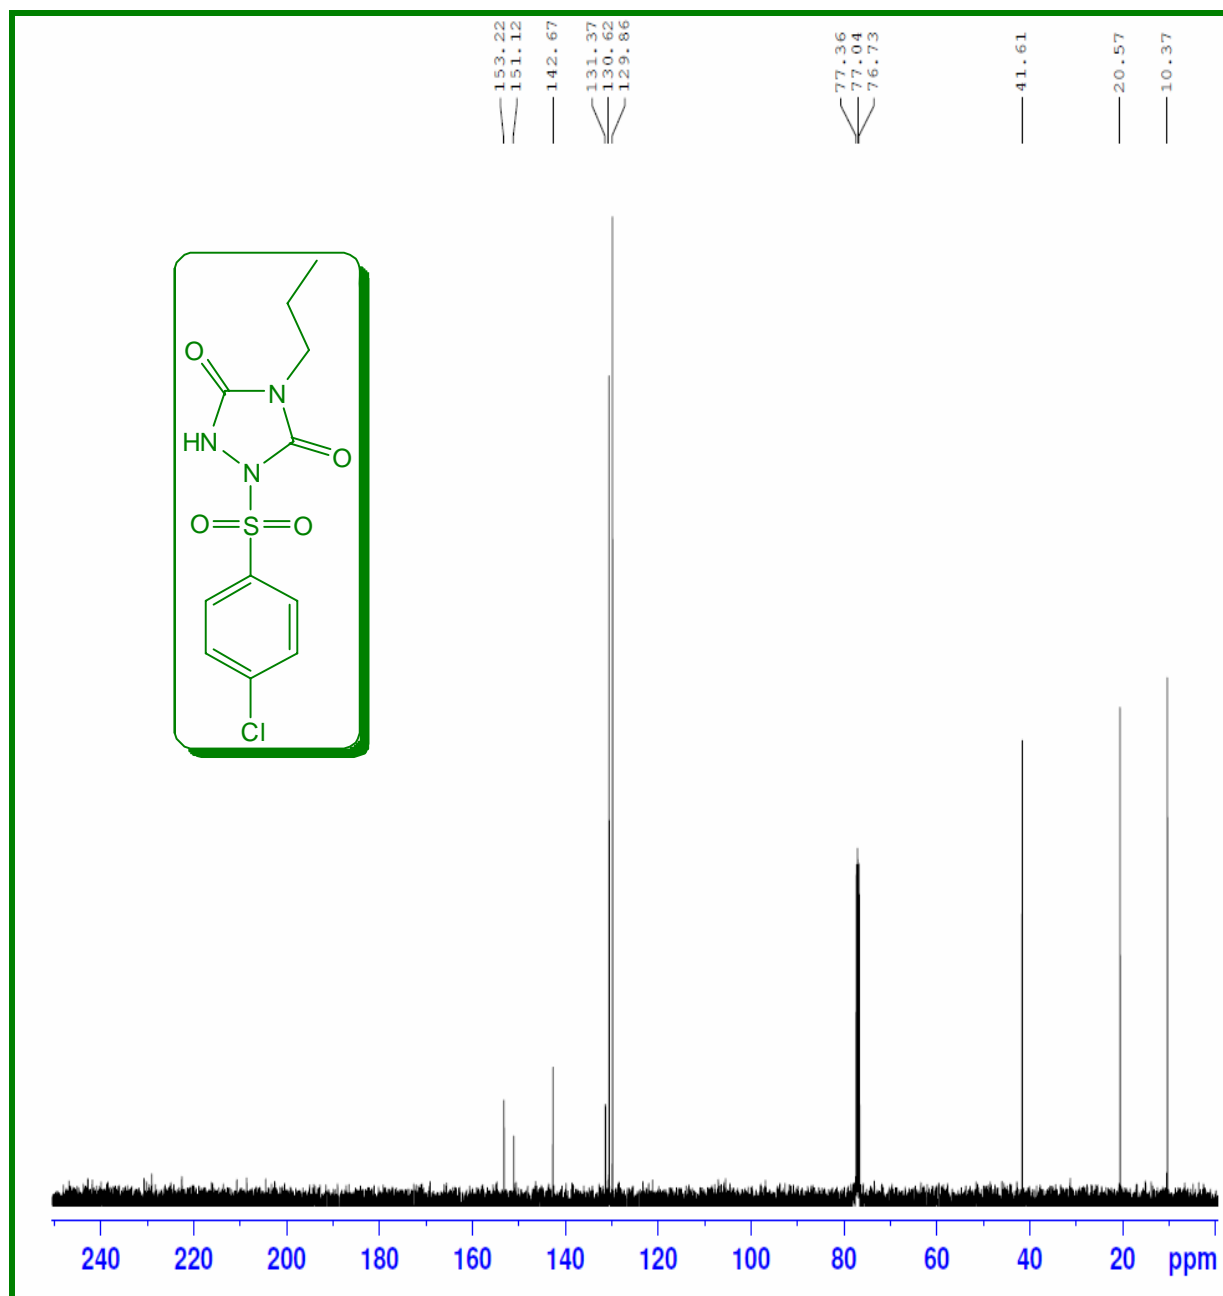

FT-IR spectrum of **5a**

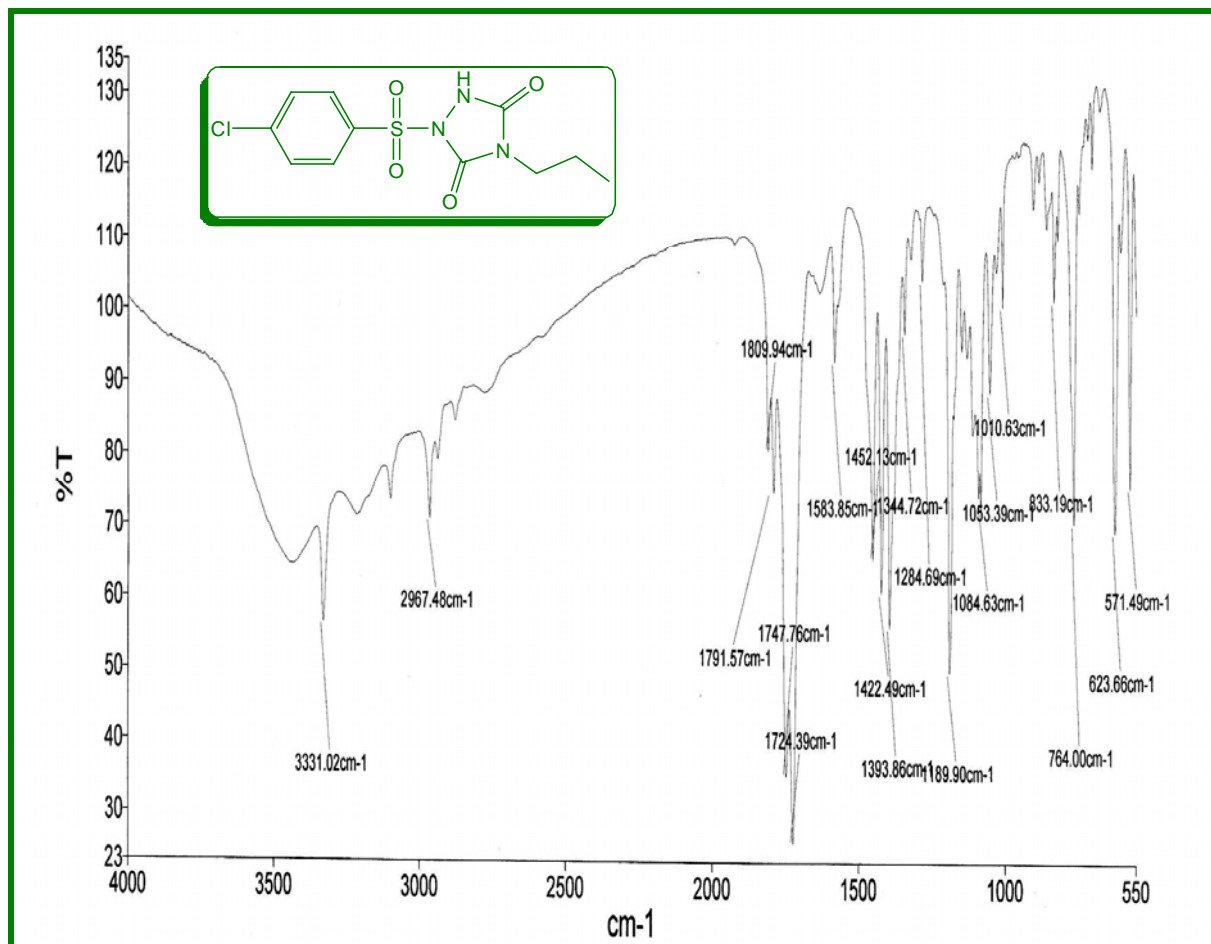

$^1\text{H}$  NMR spectrum of **5b**

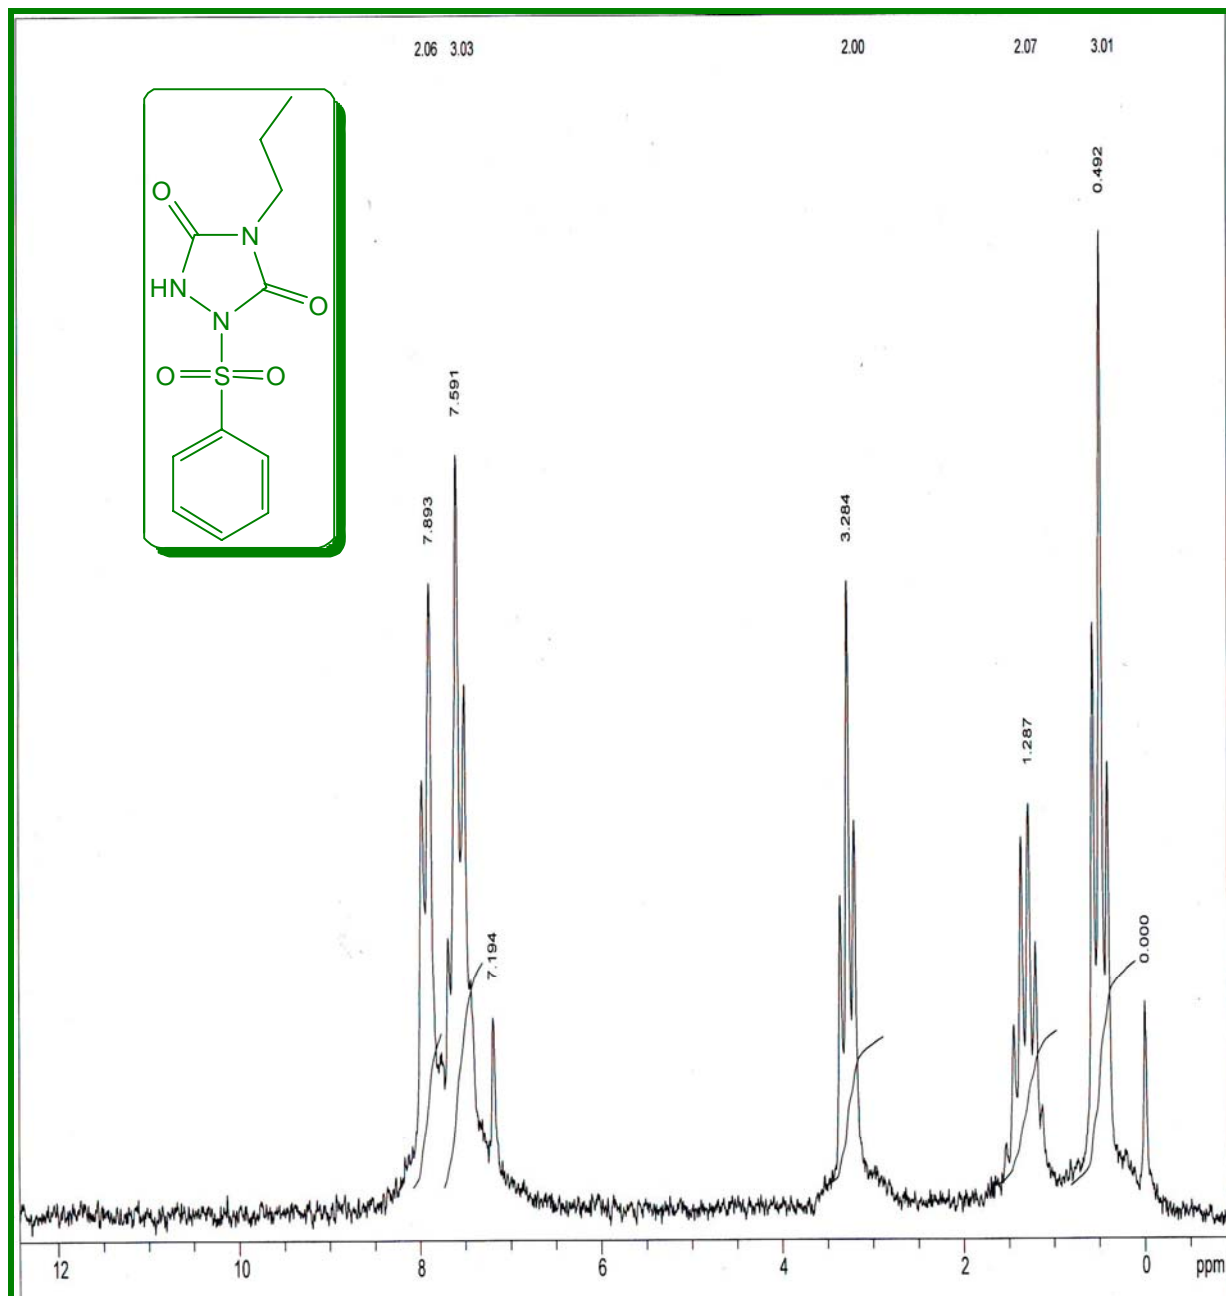



$^{13}\text{C}$  NMR spectrum of **5b**

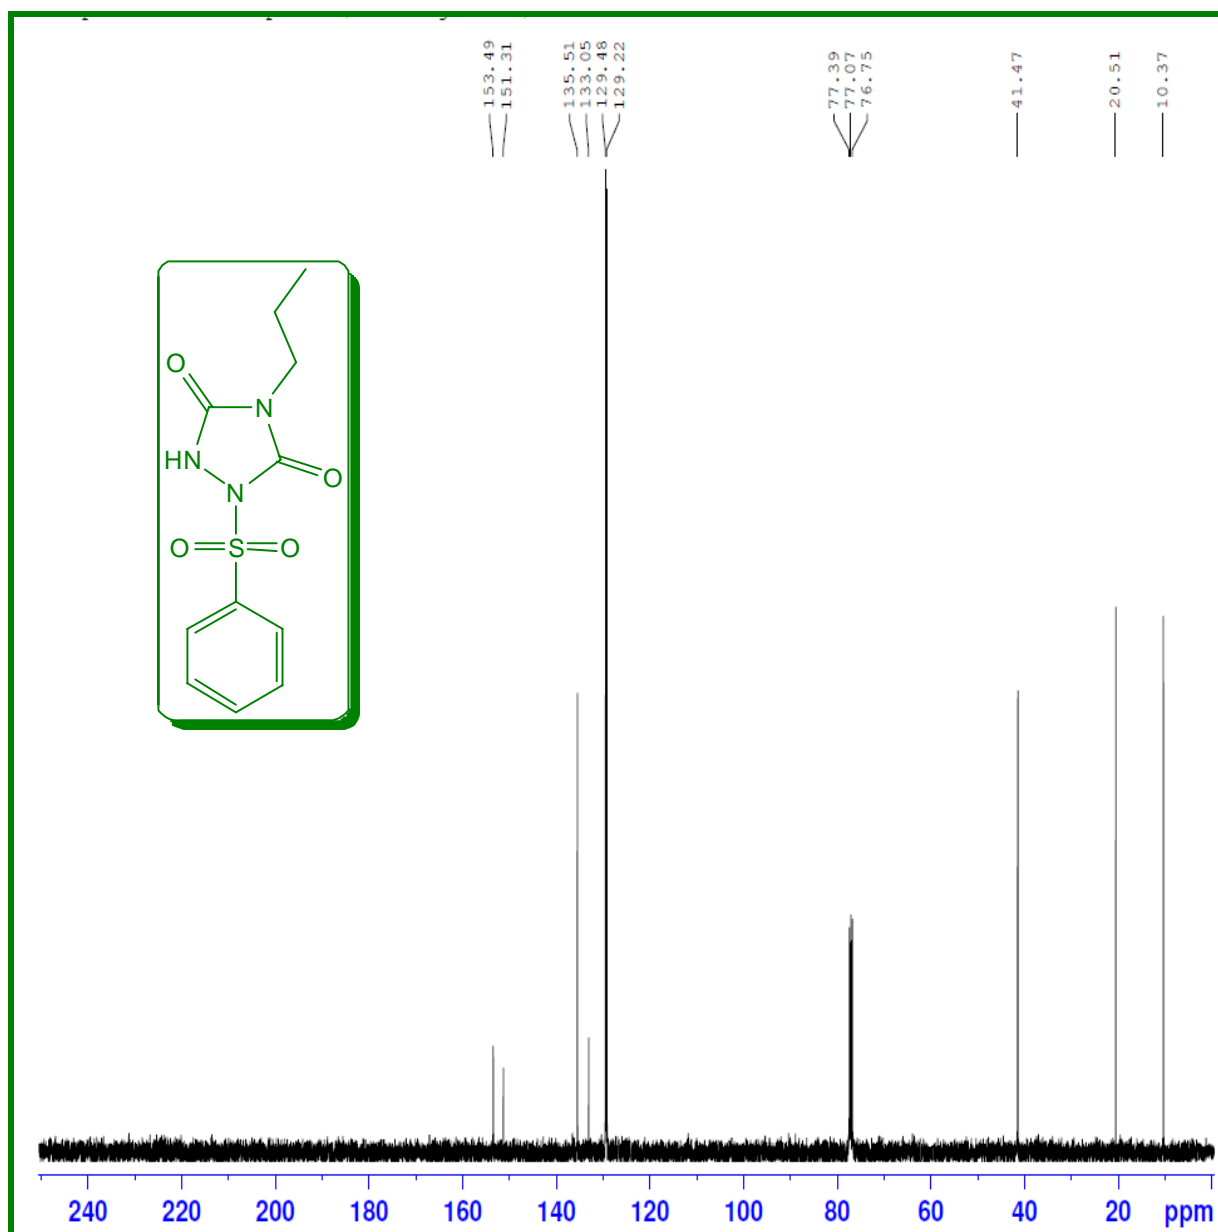

FT-IR spectrum of **5b**

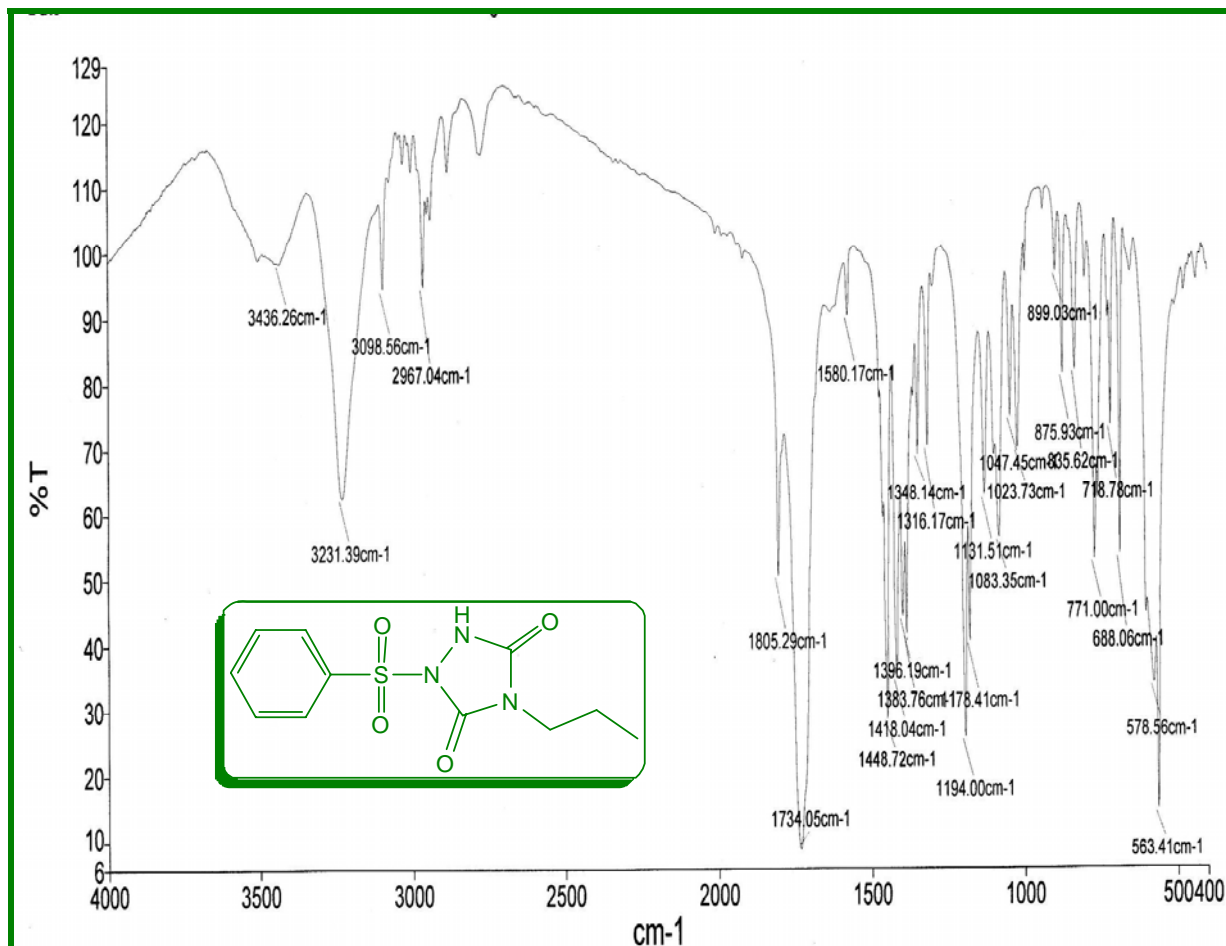

$^1\text{H}$  NMR spectrum of **5c**

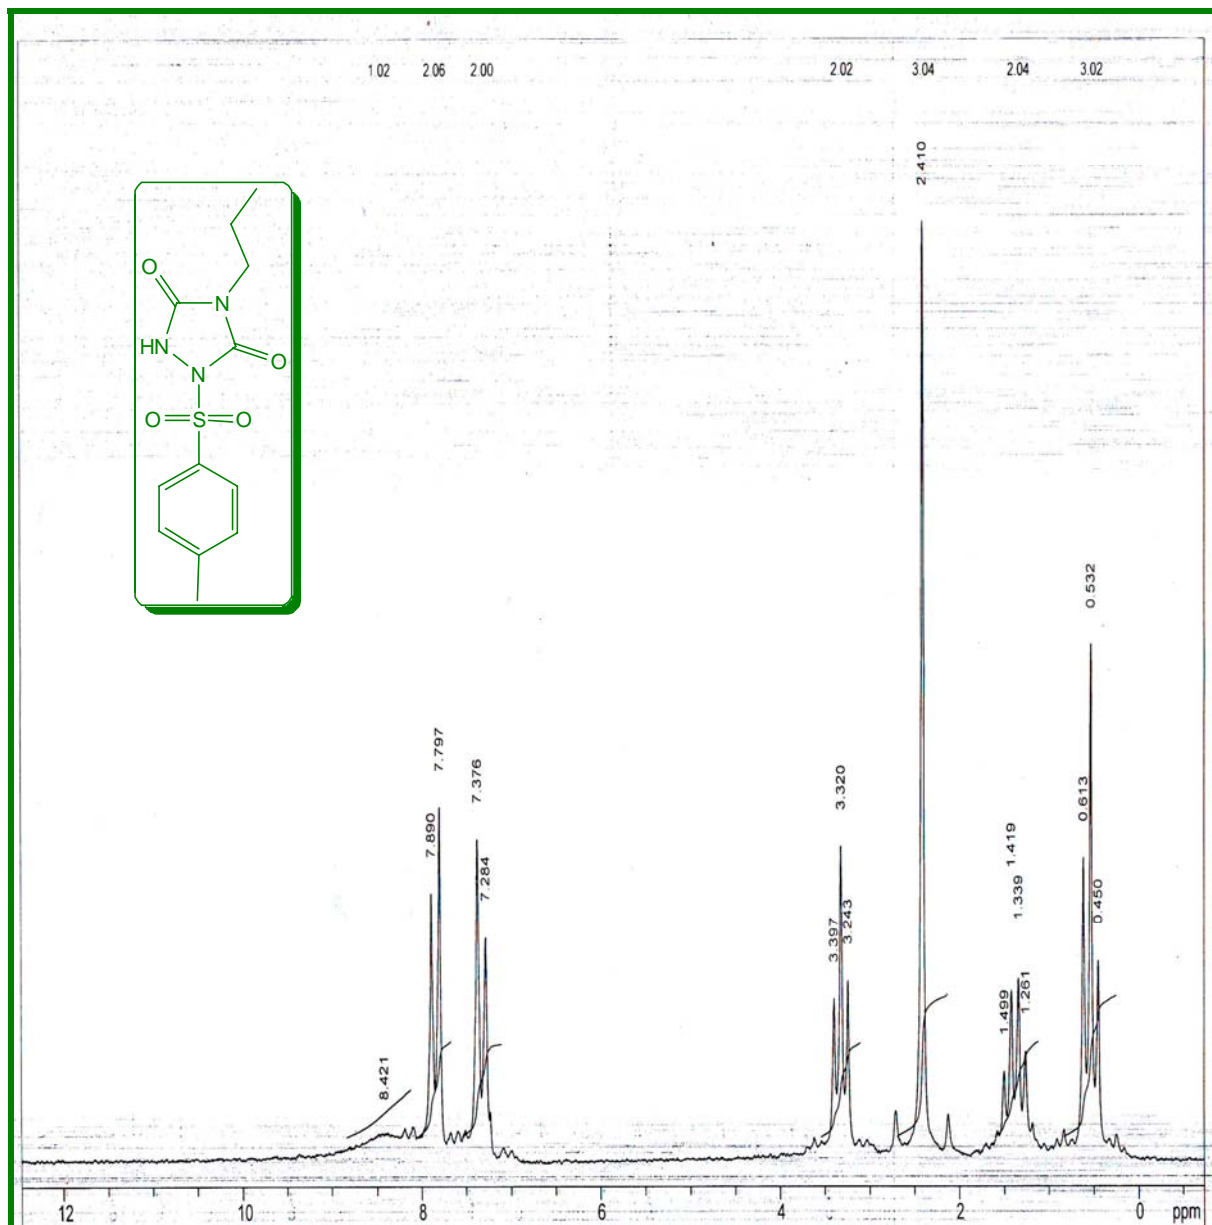

$^{13}\text{C}$  NMR spectrum of **5c**

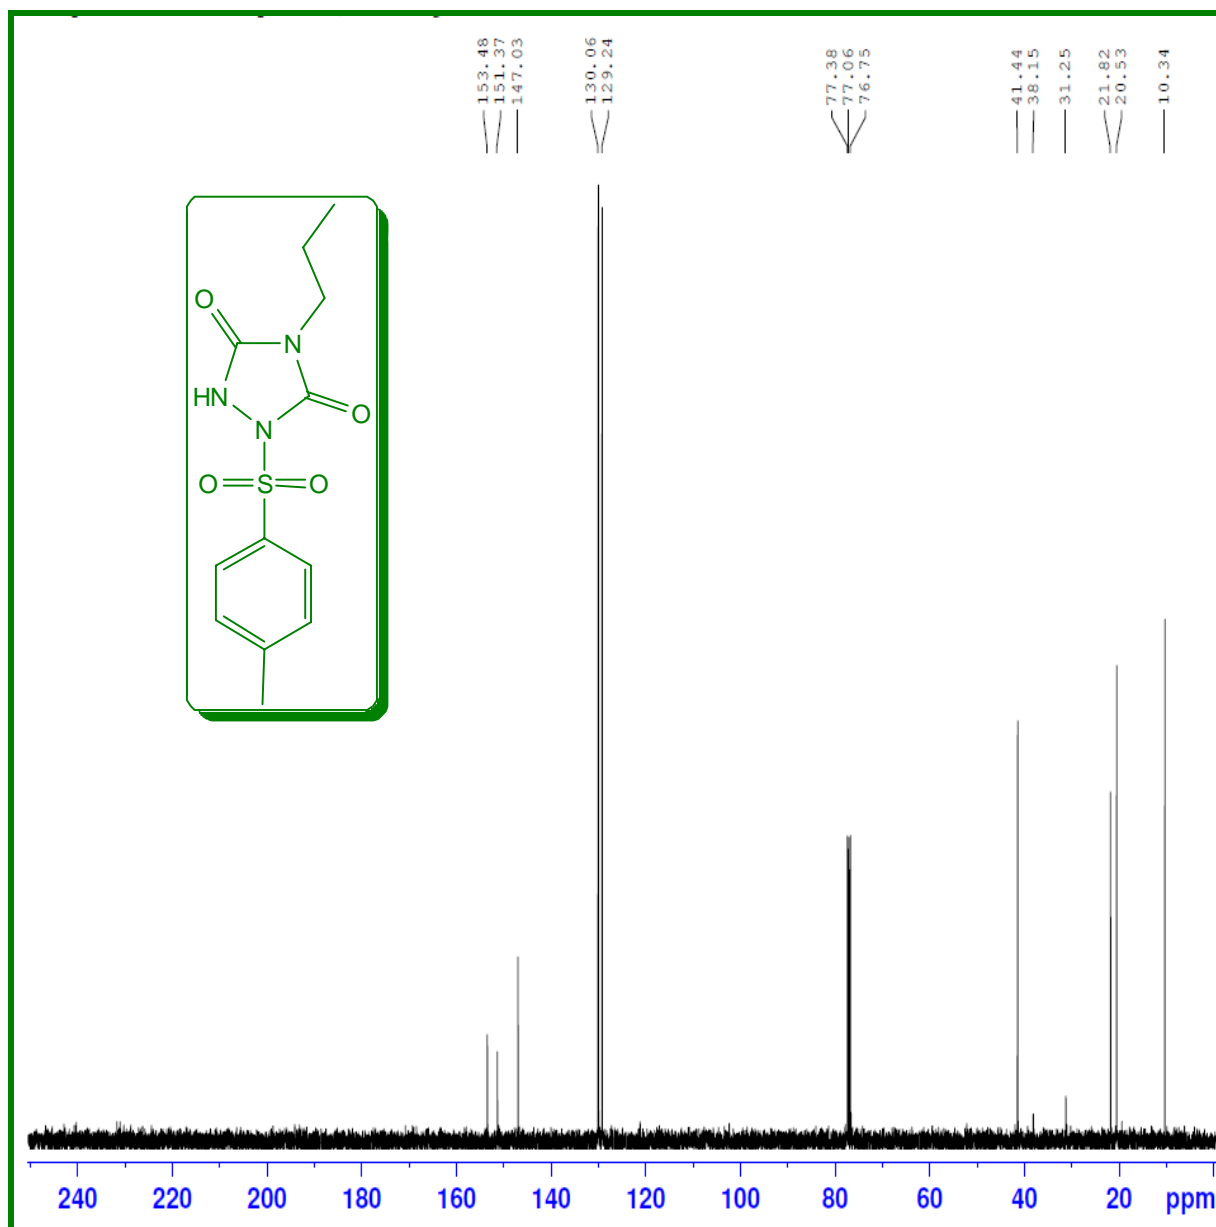

FT-IR spectrum of **5c**

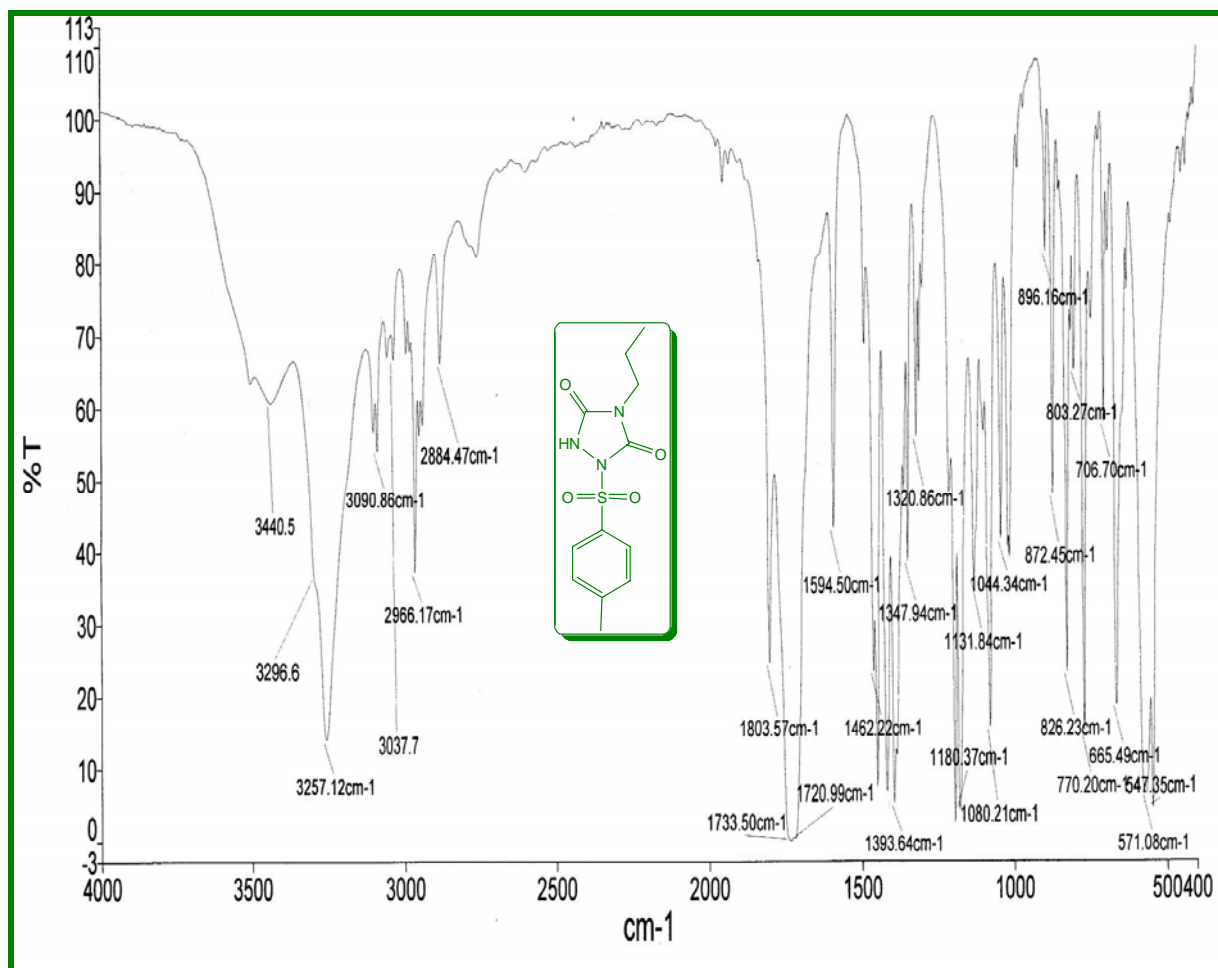

<sup>1</sup>H NMR spectrum of **5d**

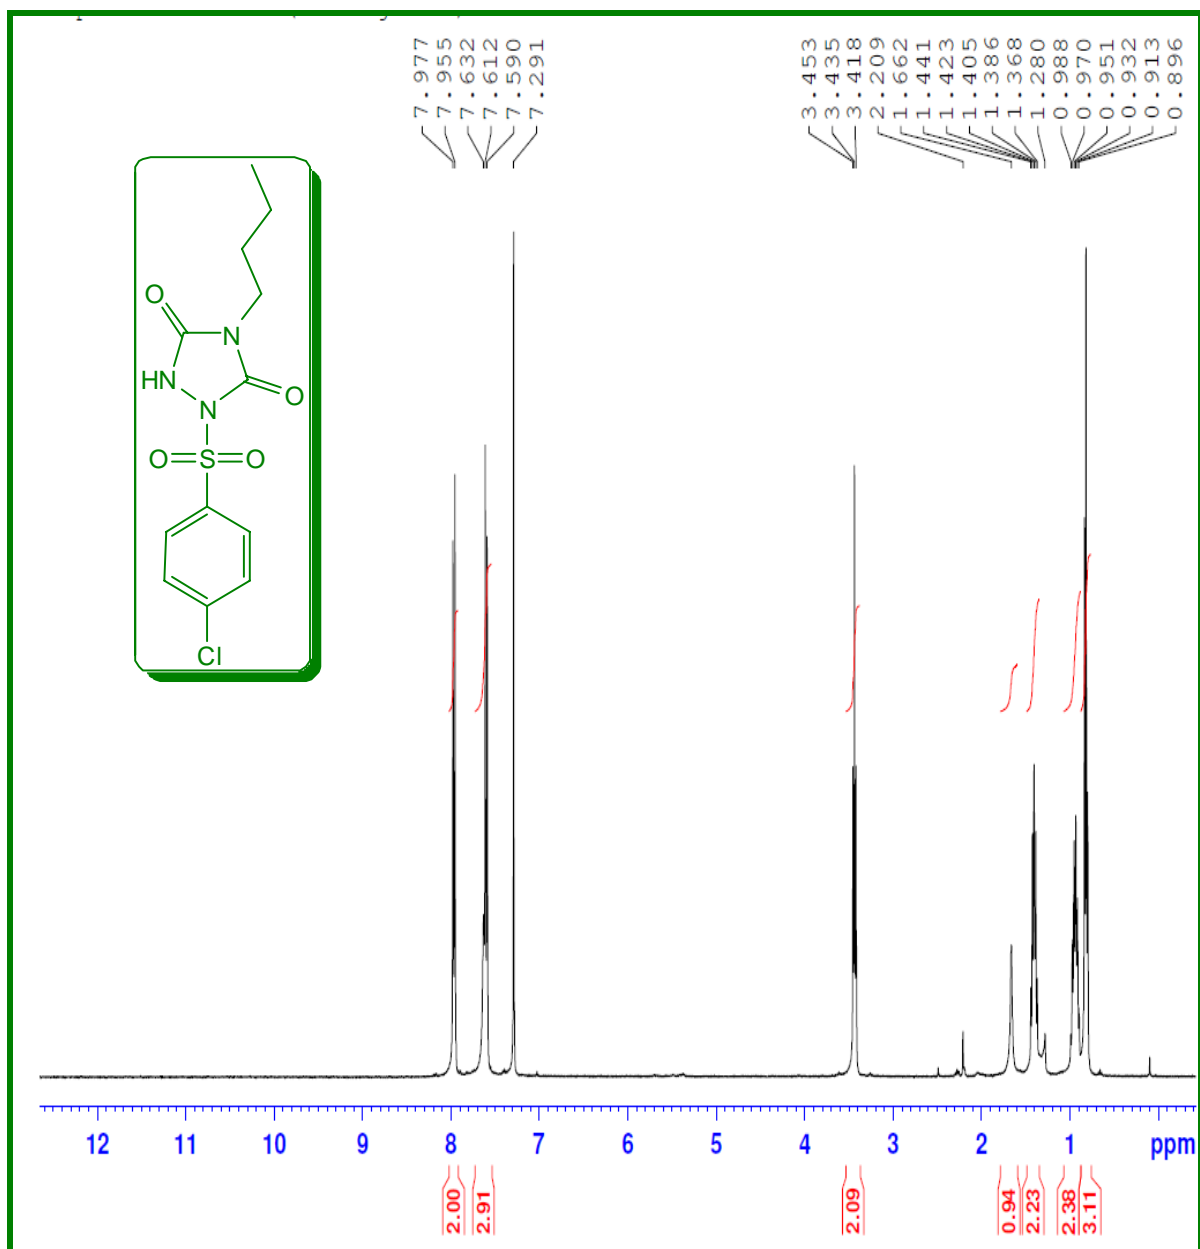

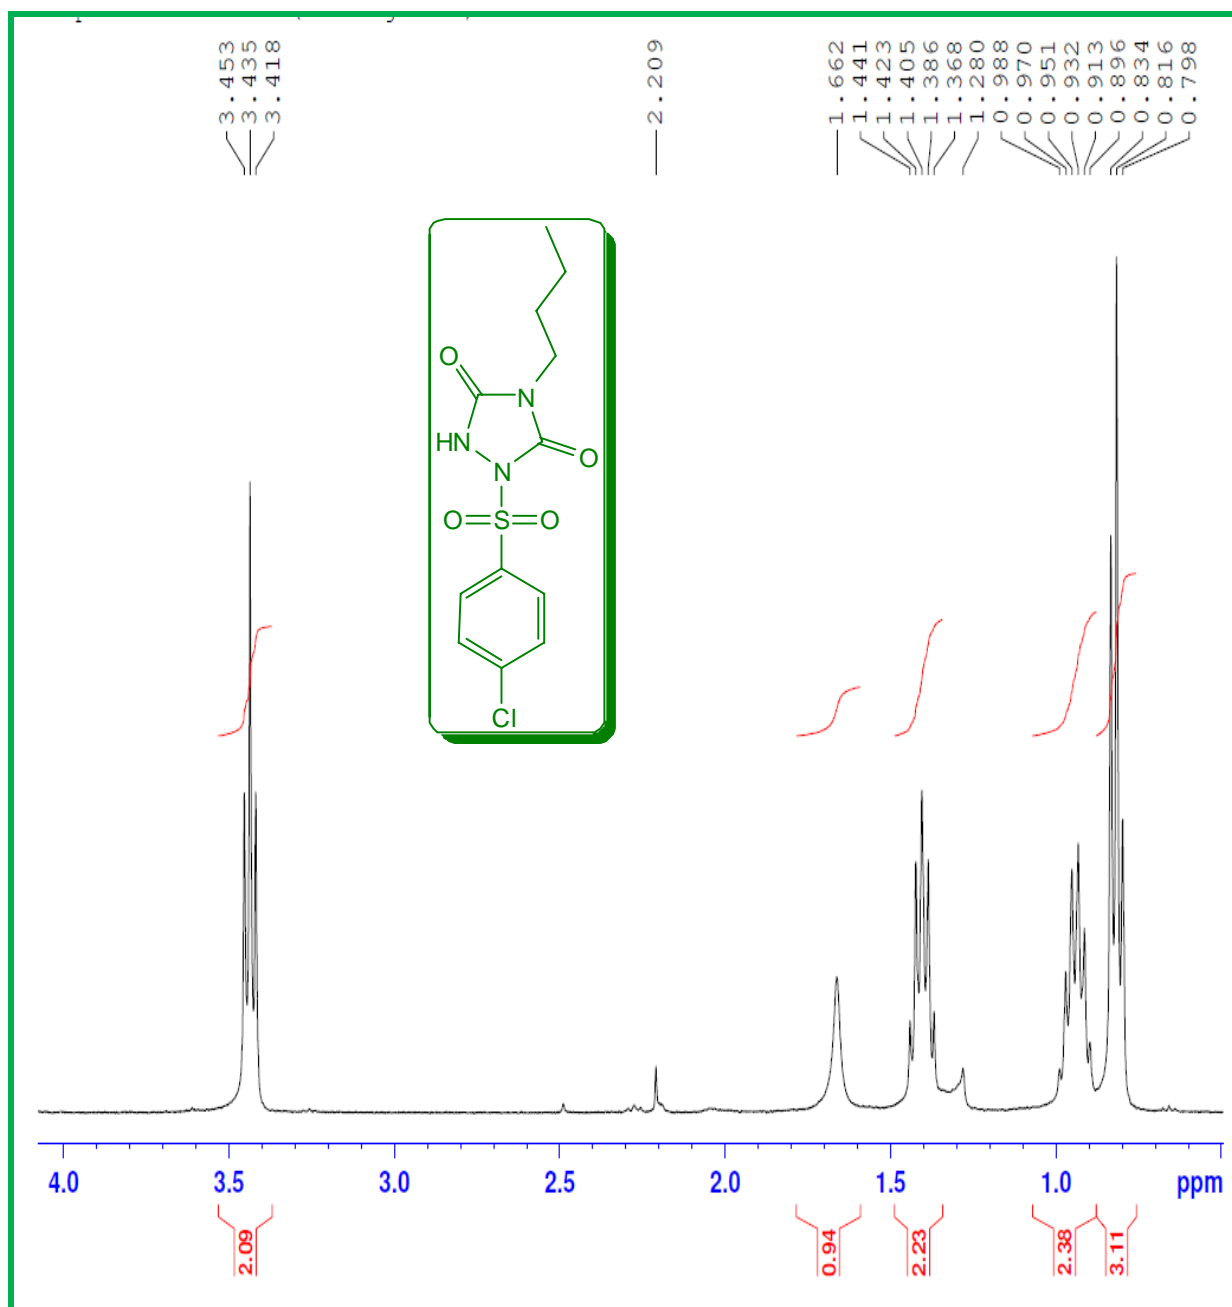

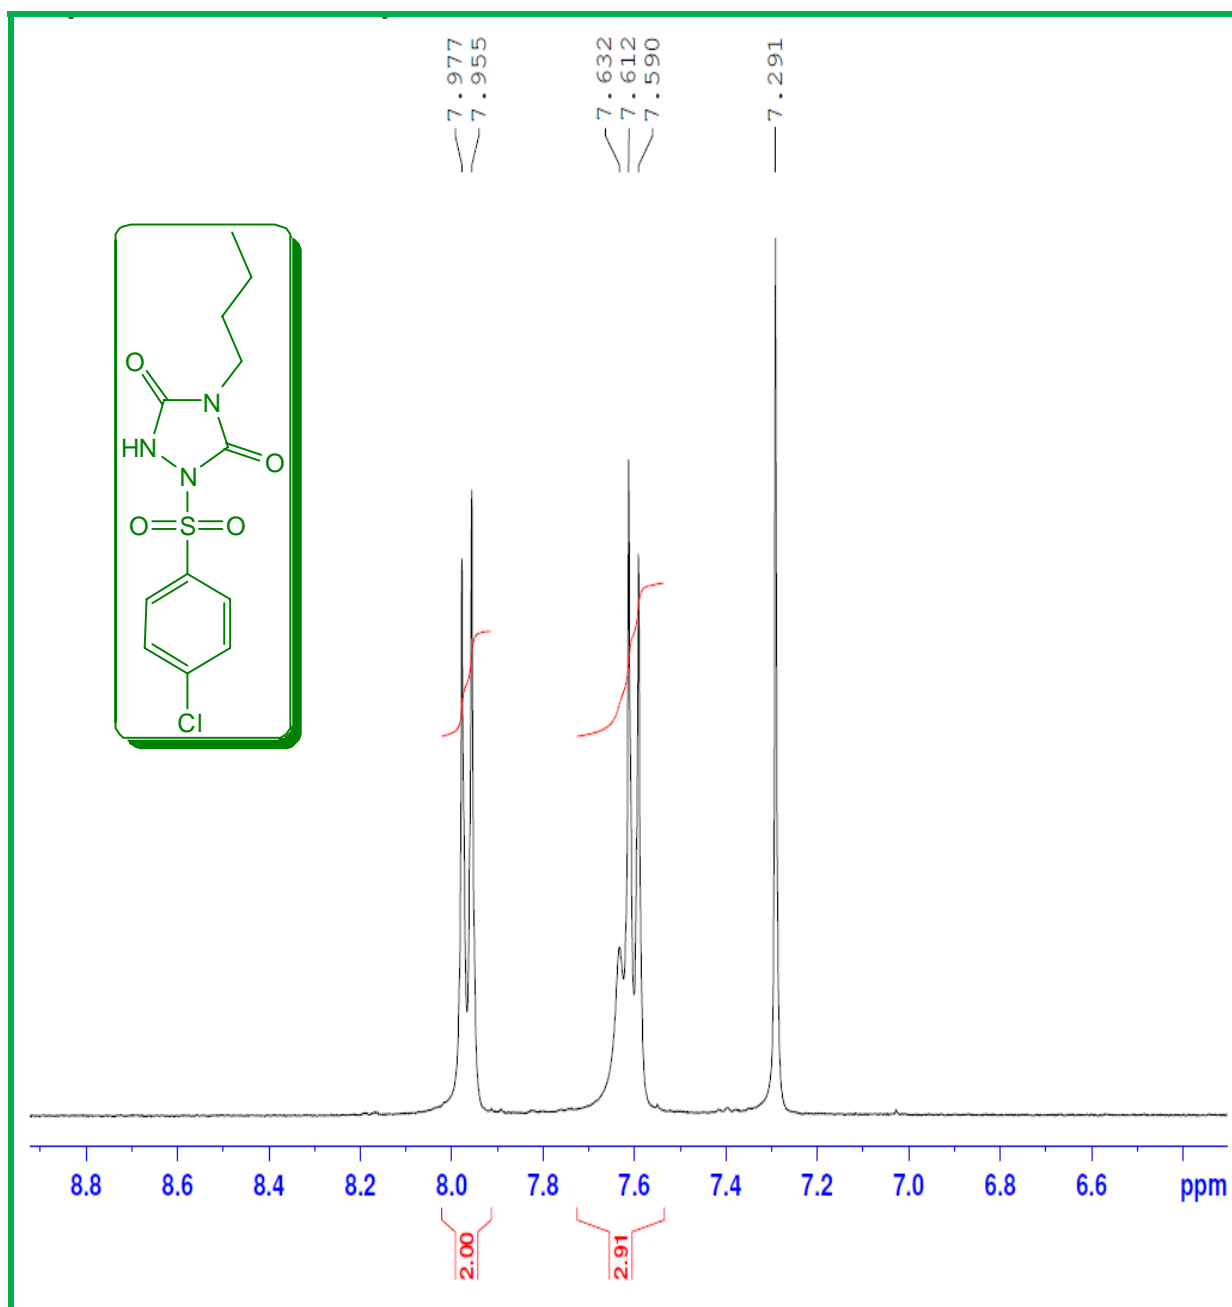



$^{13}\text{C}$  NMR spectrum of **5d**

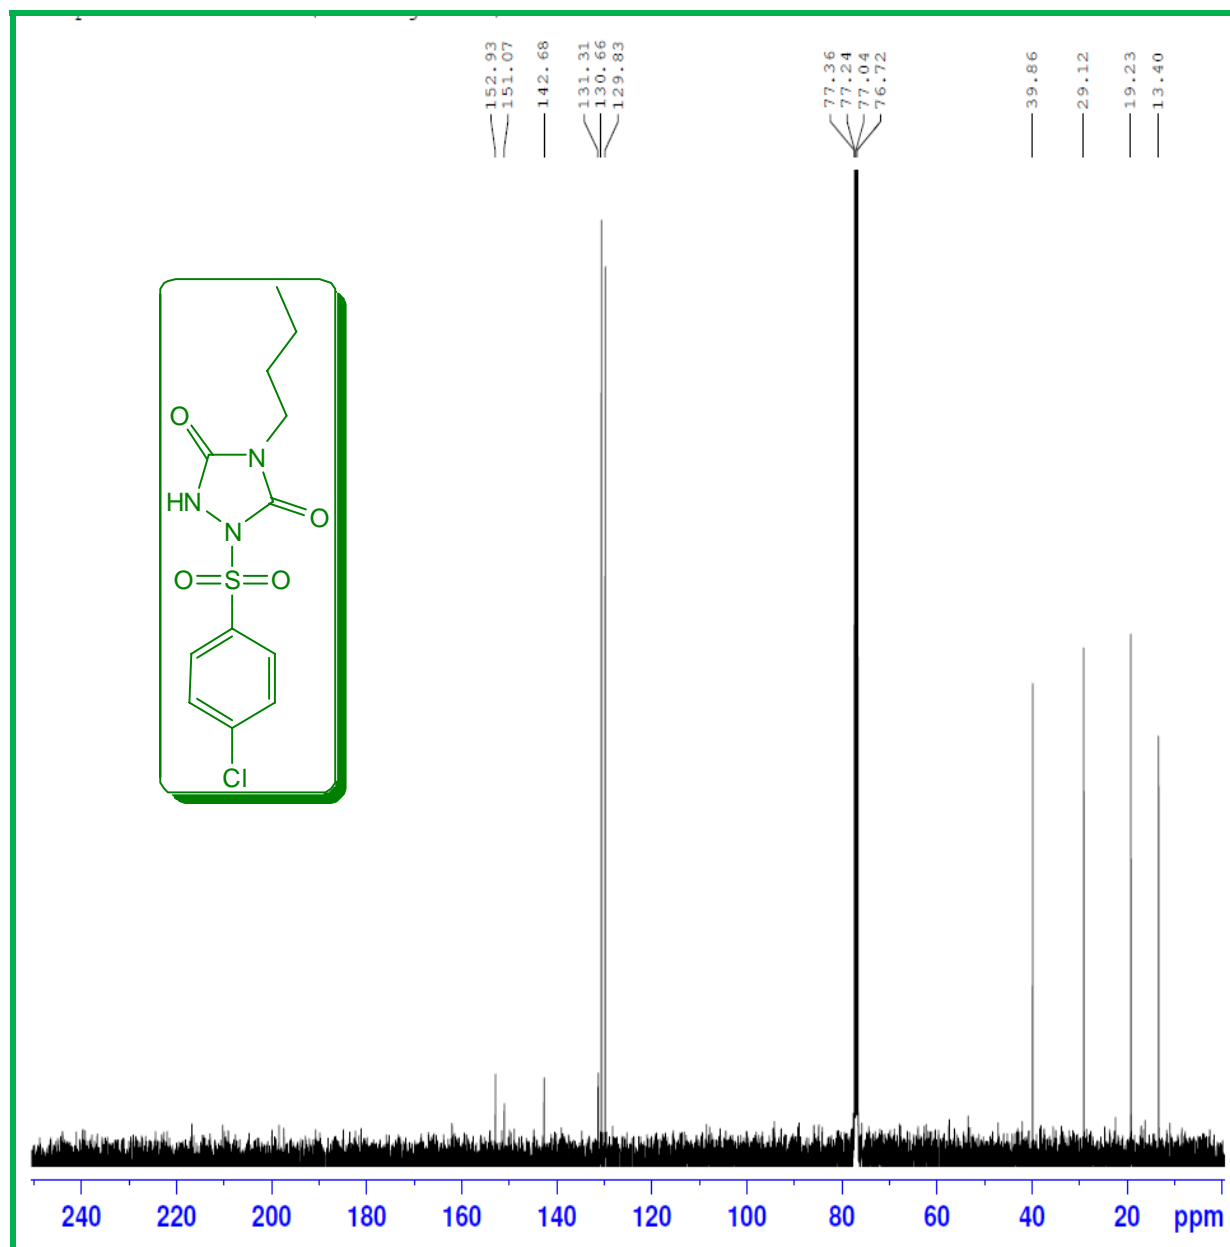

FT-IR spectrum of **5d**

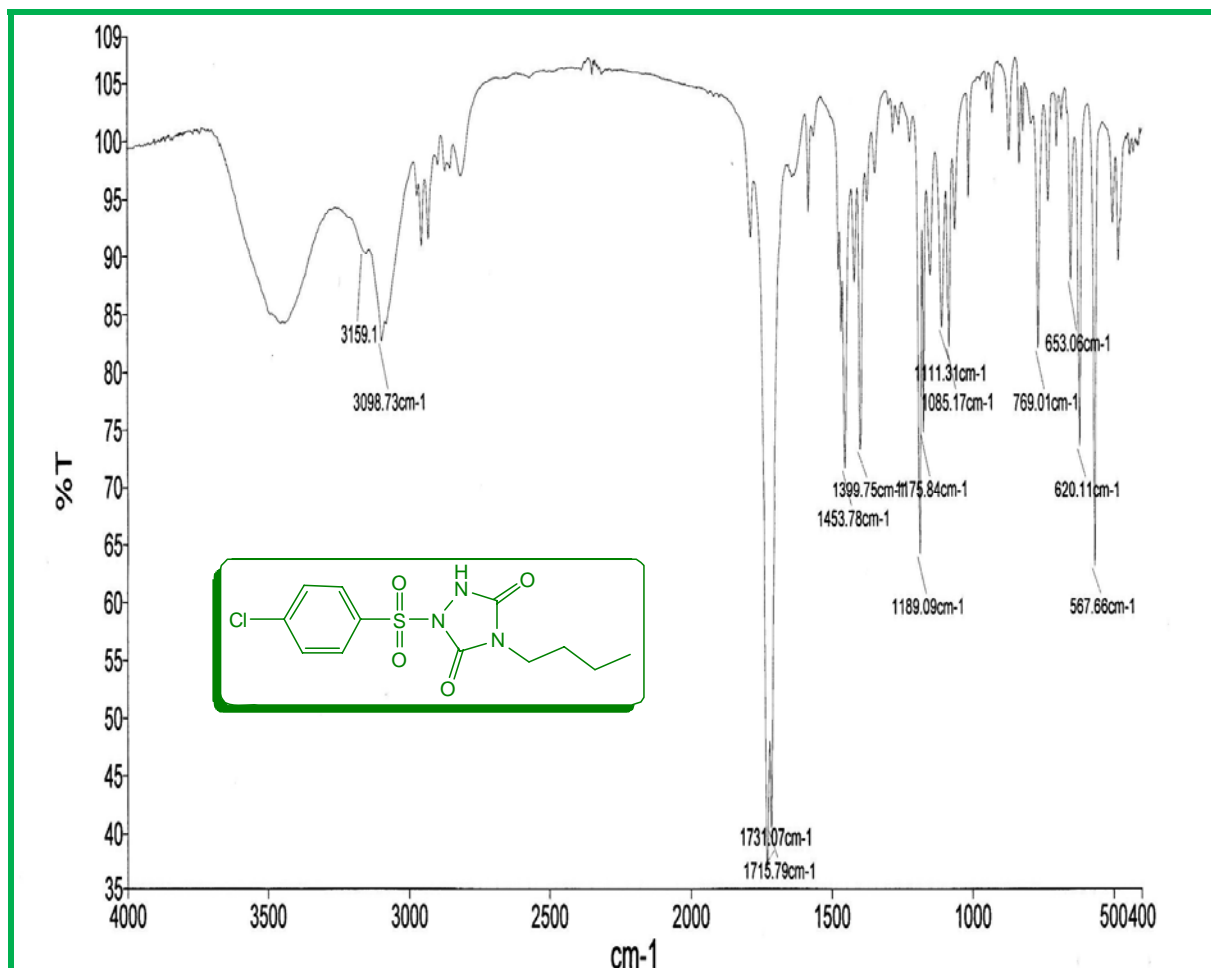

$^1\text{H}$  NMR spectrum of **5e**

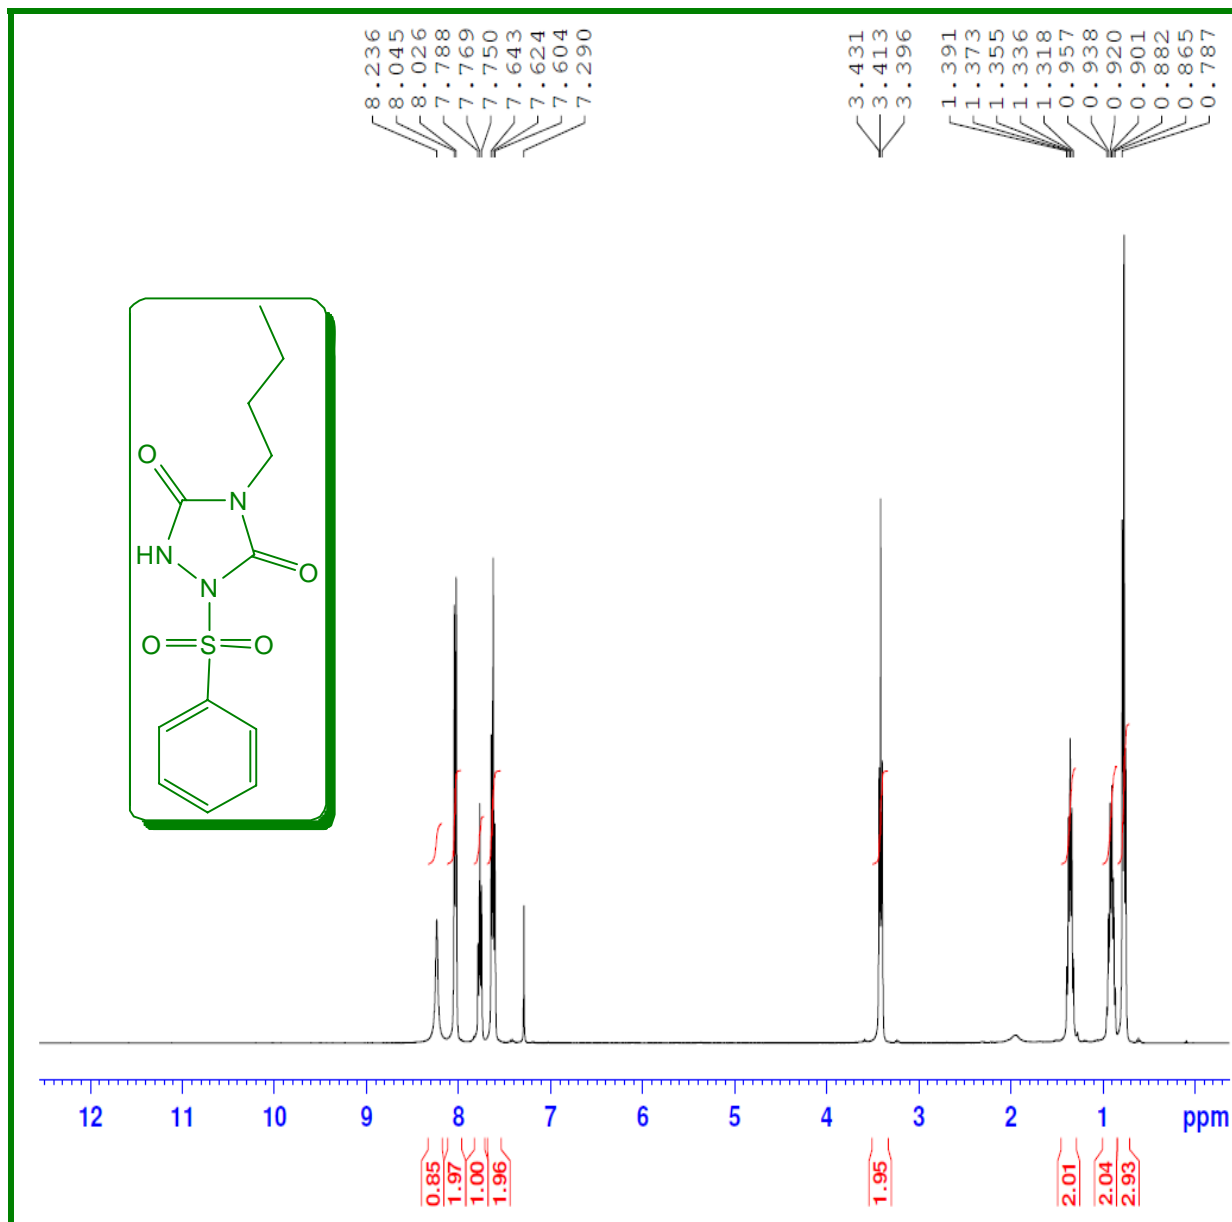

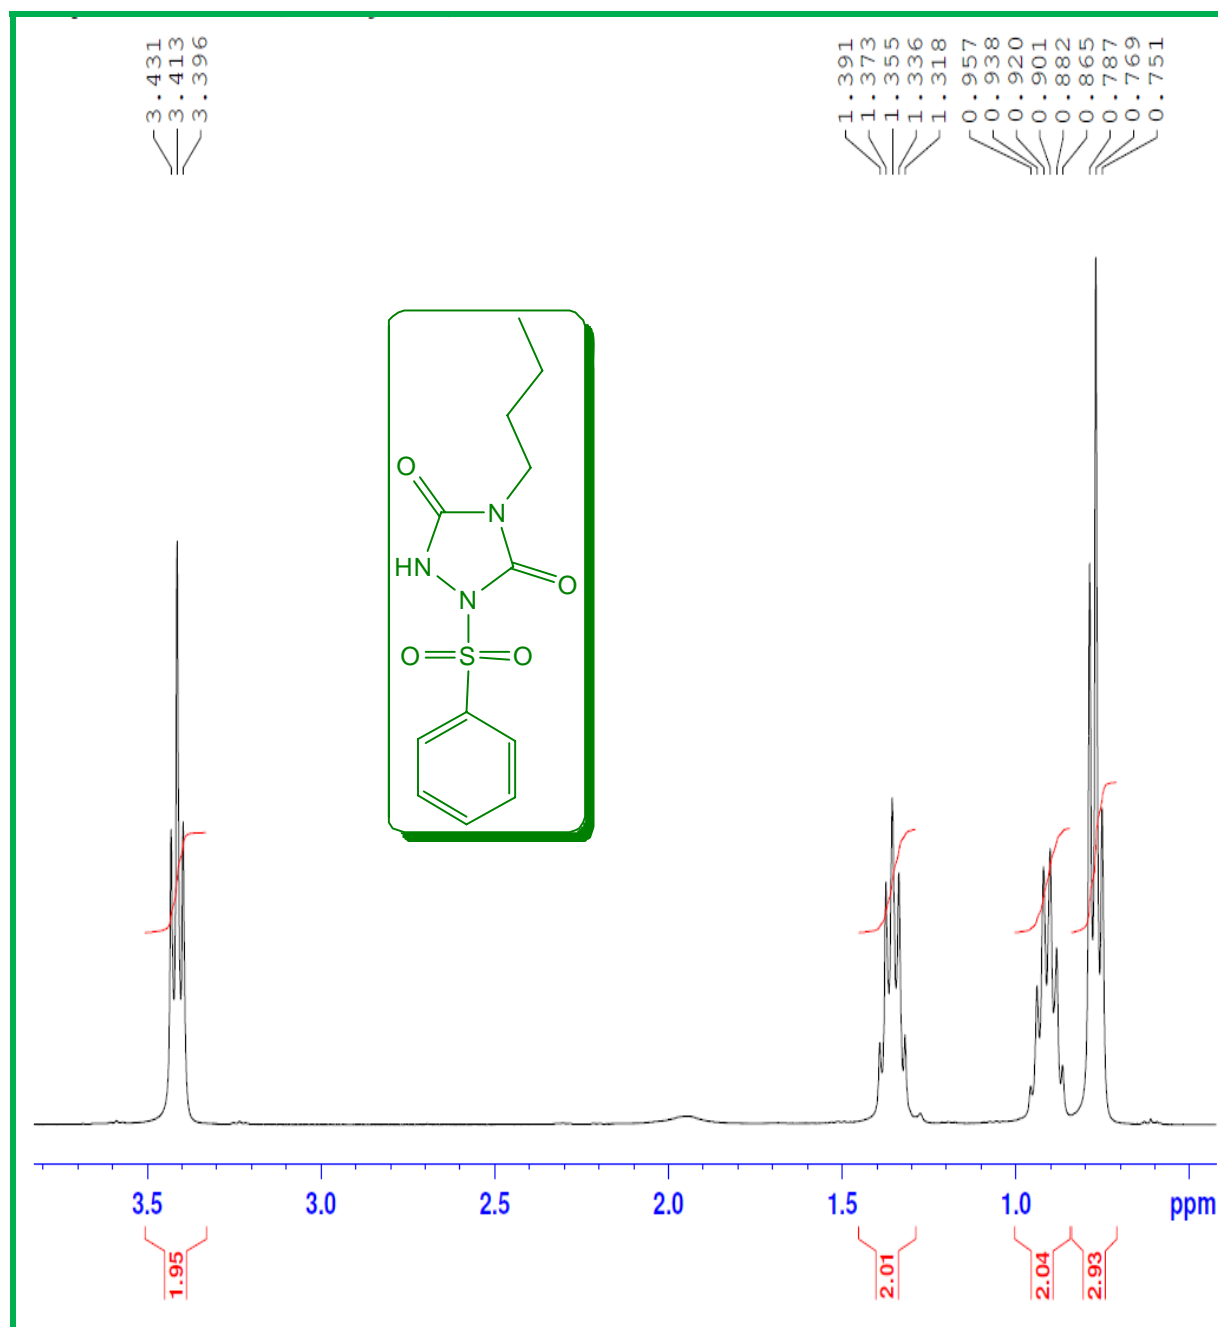

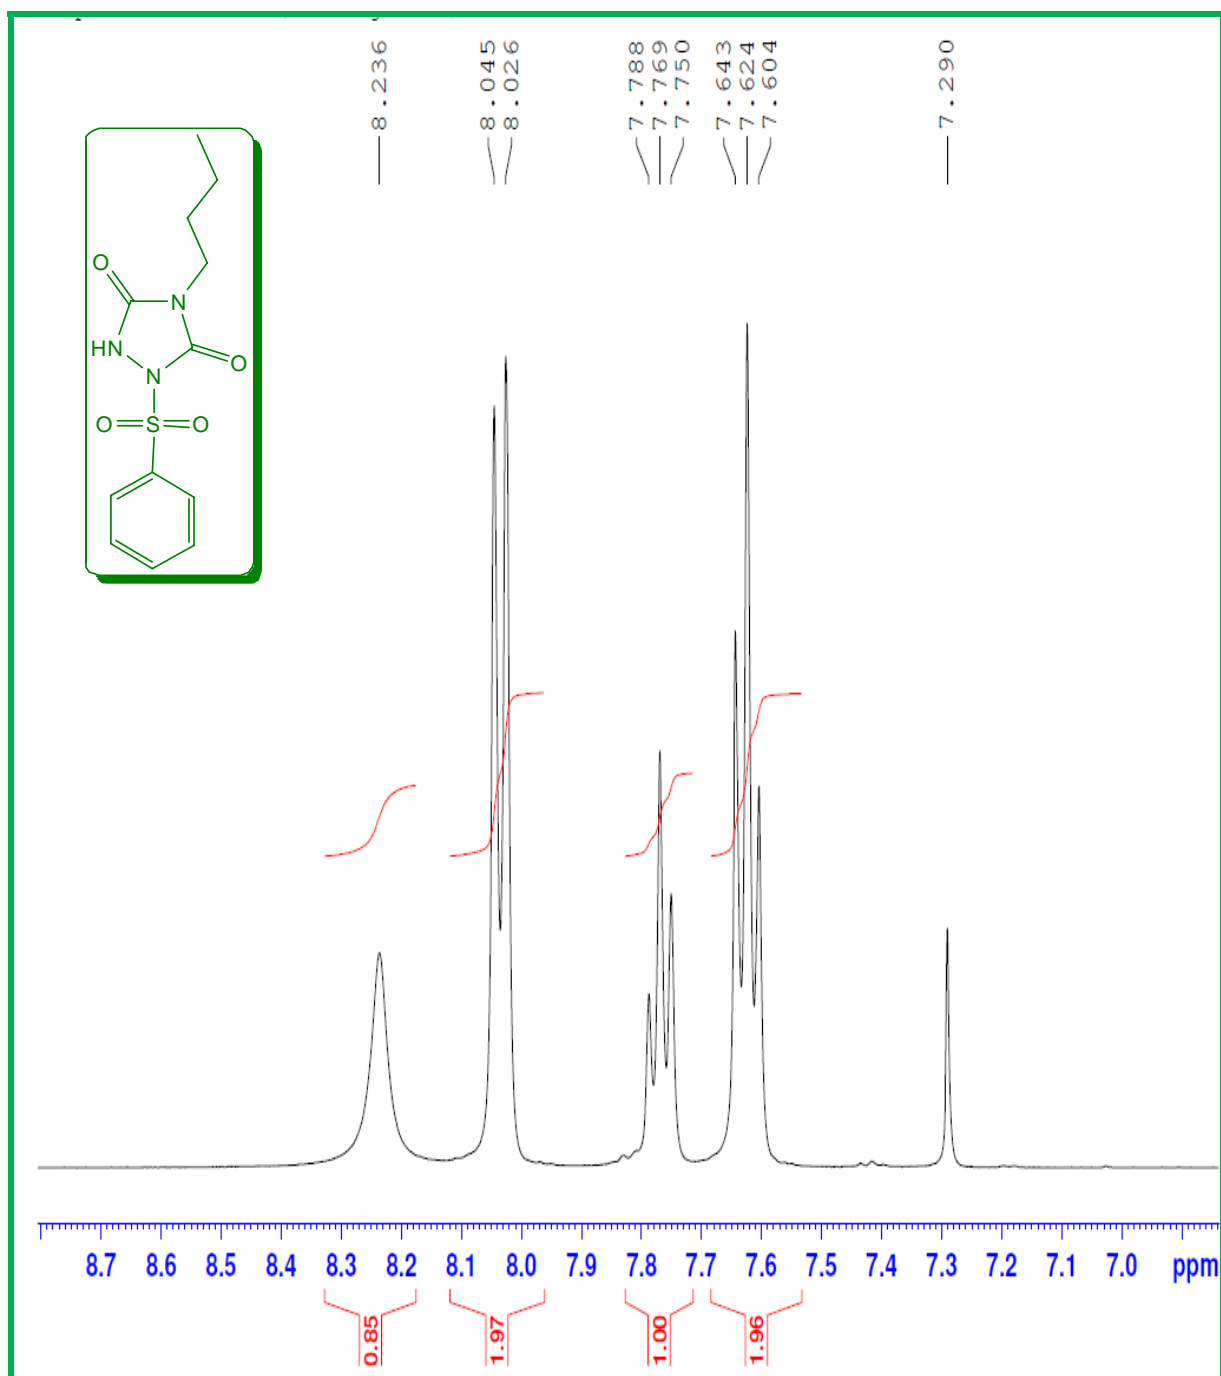

$^{13}\text{C}$  NMR spectrum of **5e**

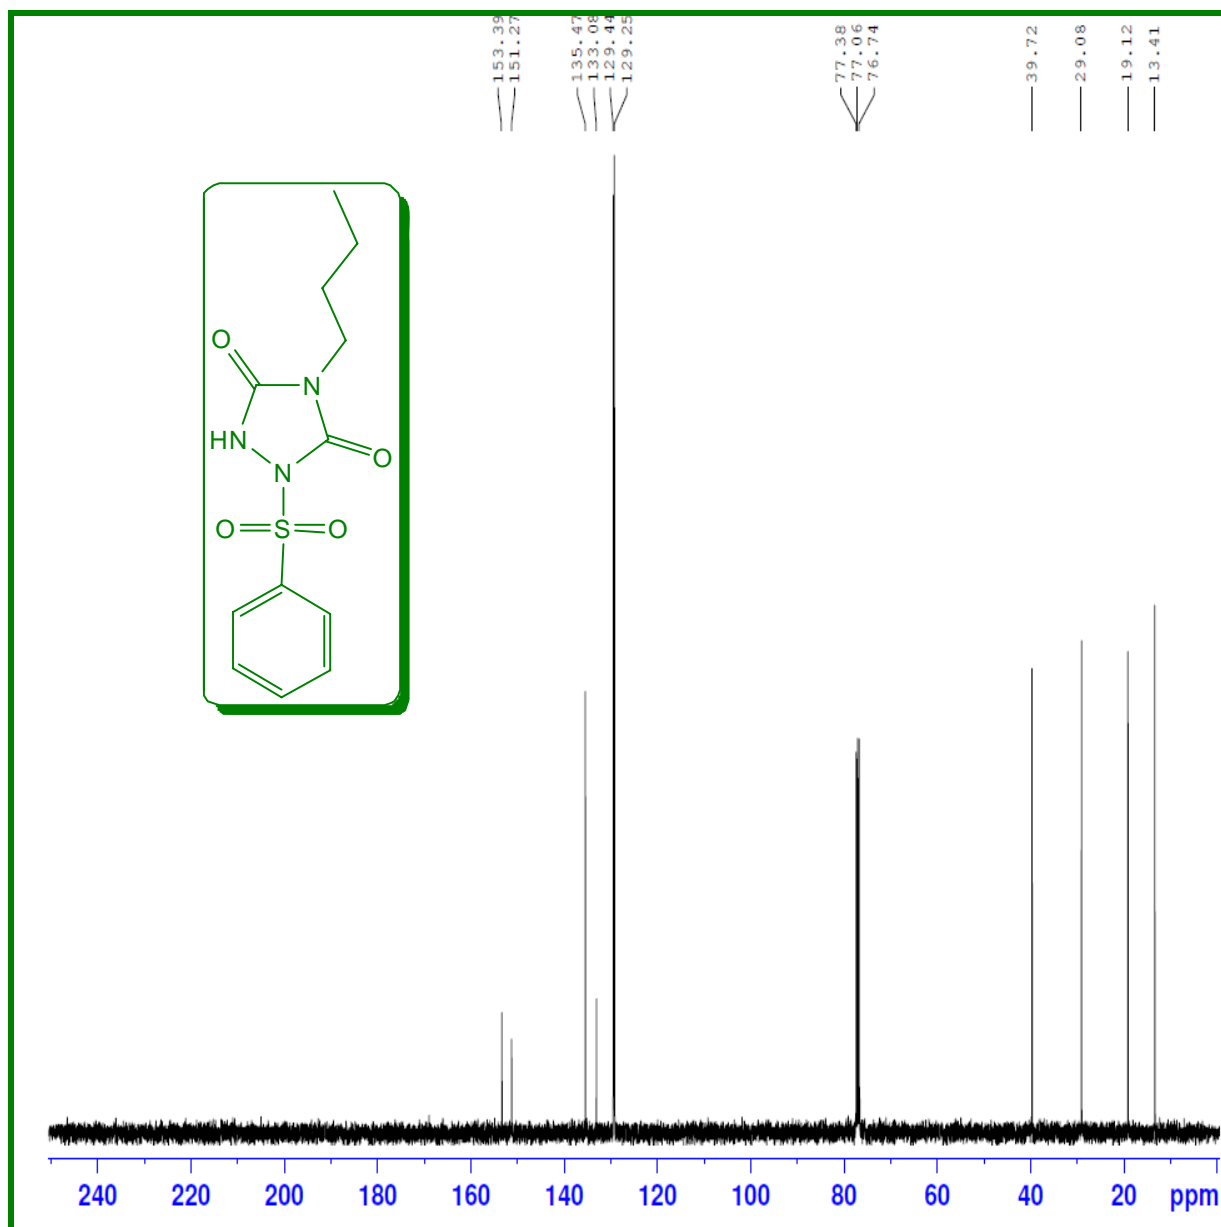

FT-IR spectrum of **5e**

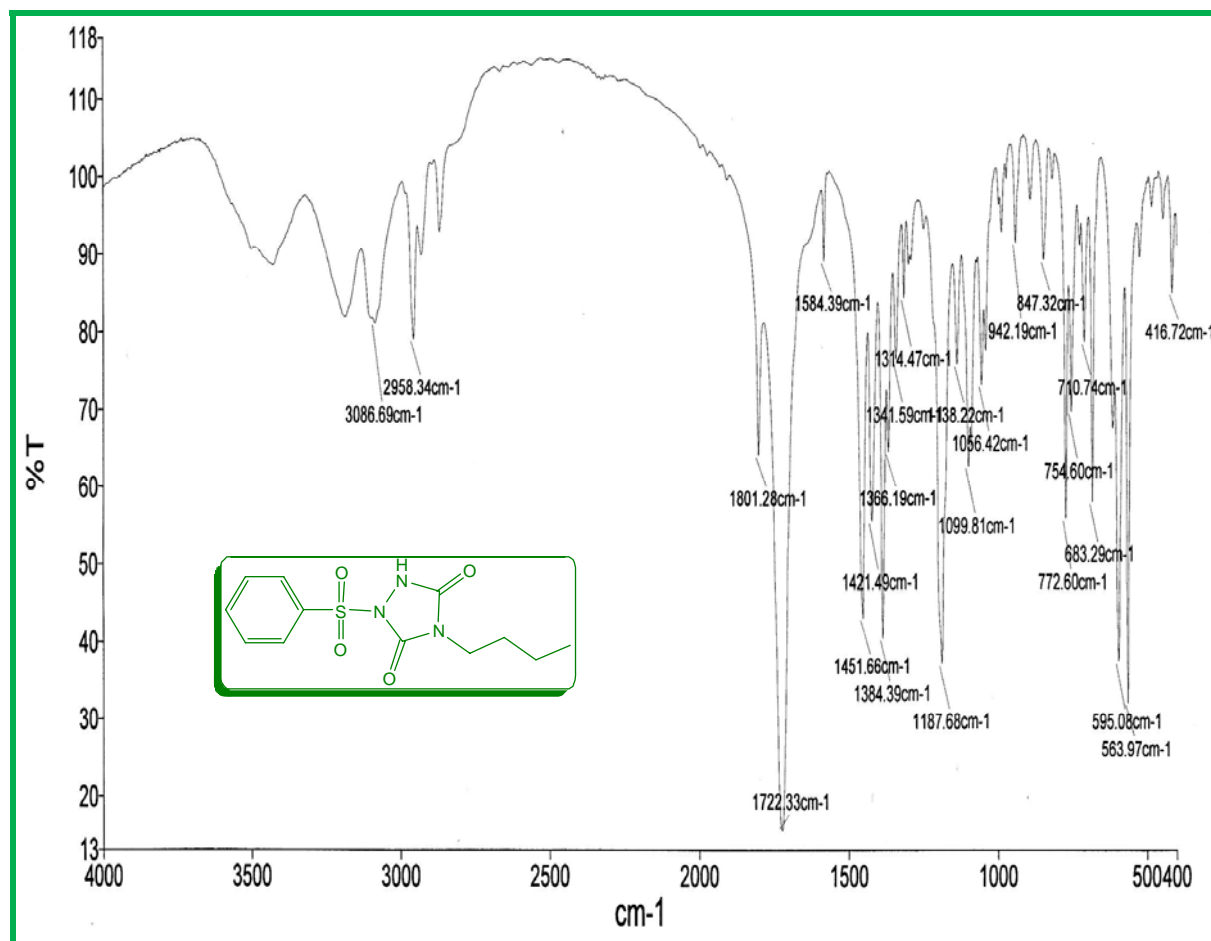

$^1\text{H}$  NMR spectrum of **5f**

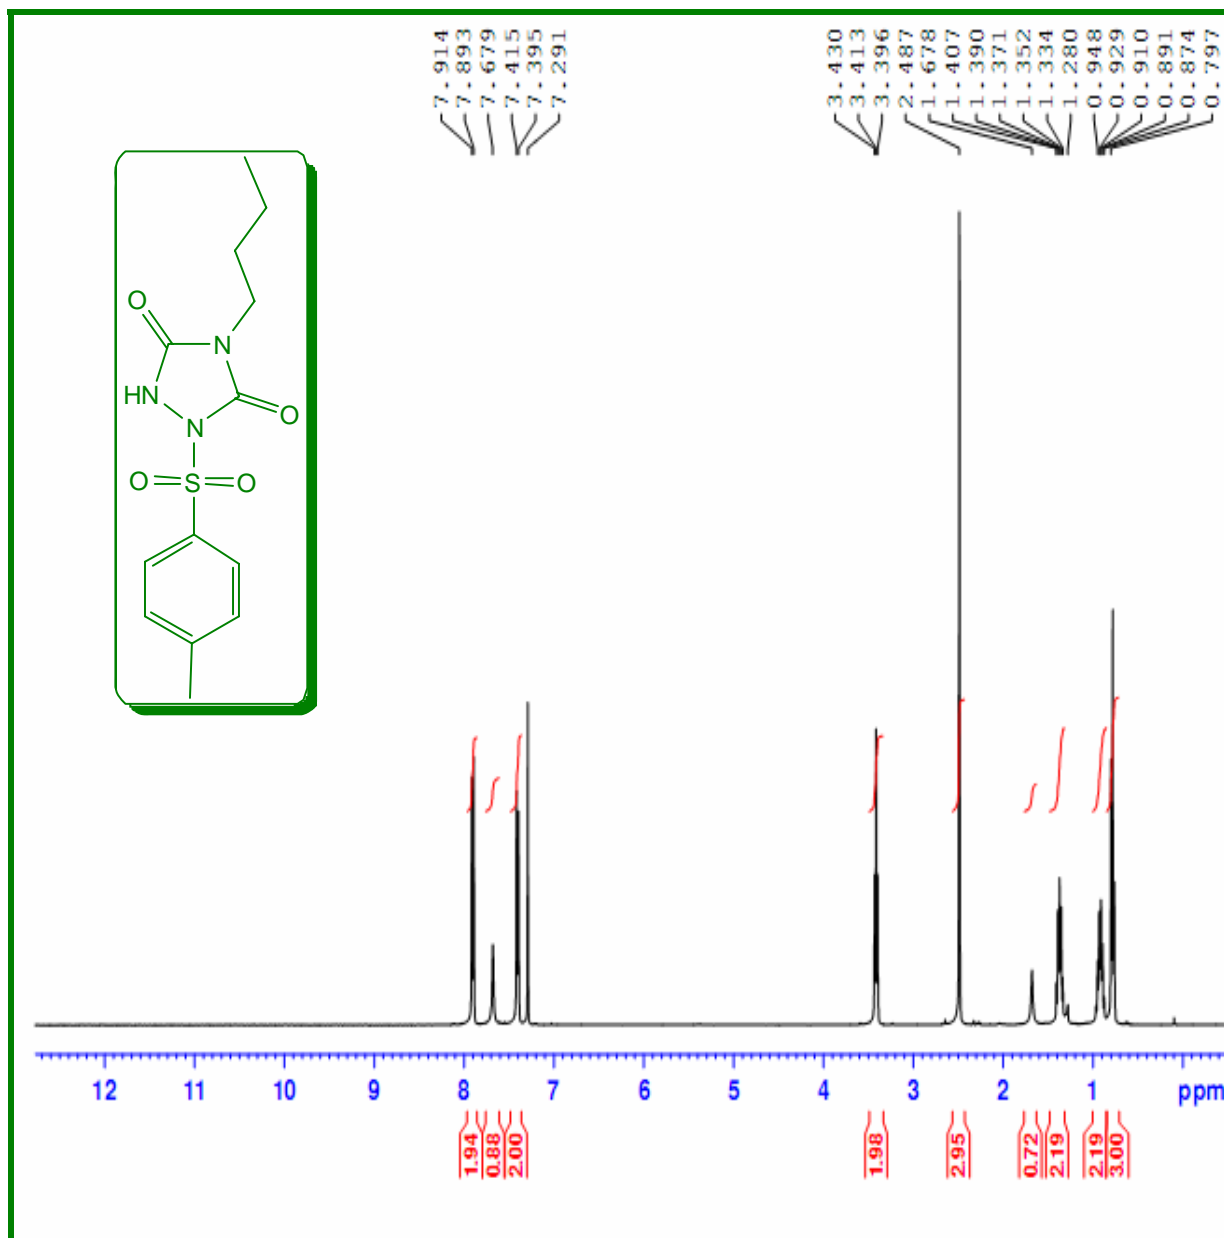



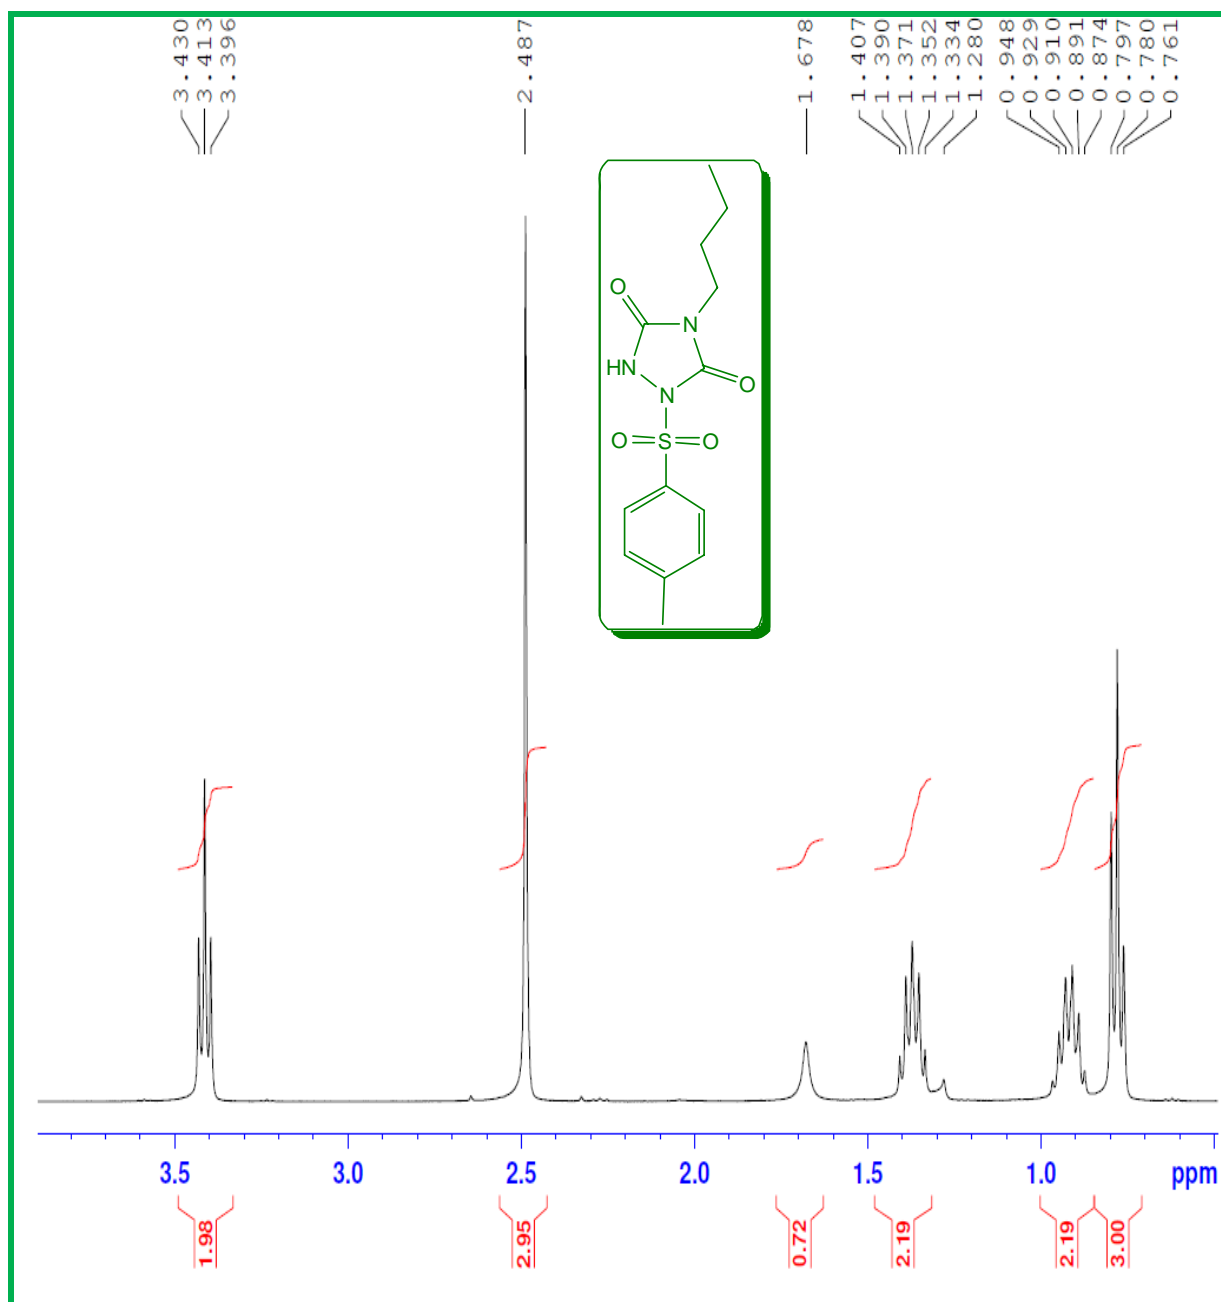

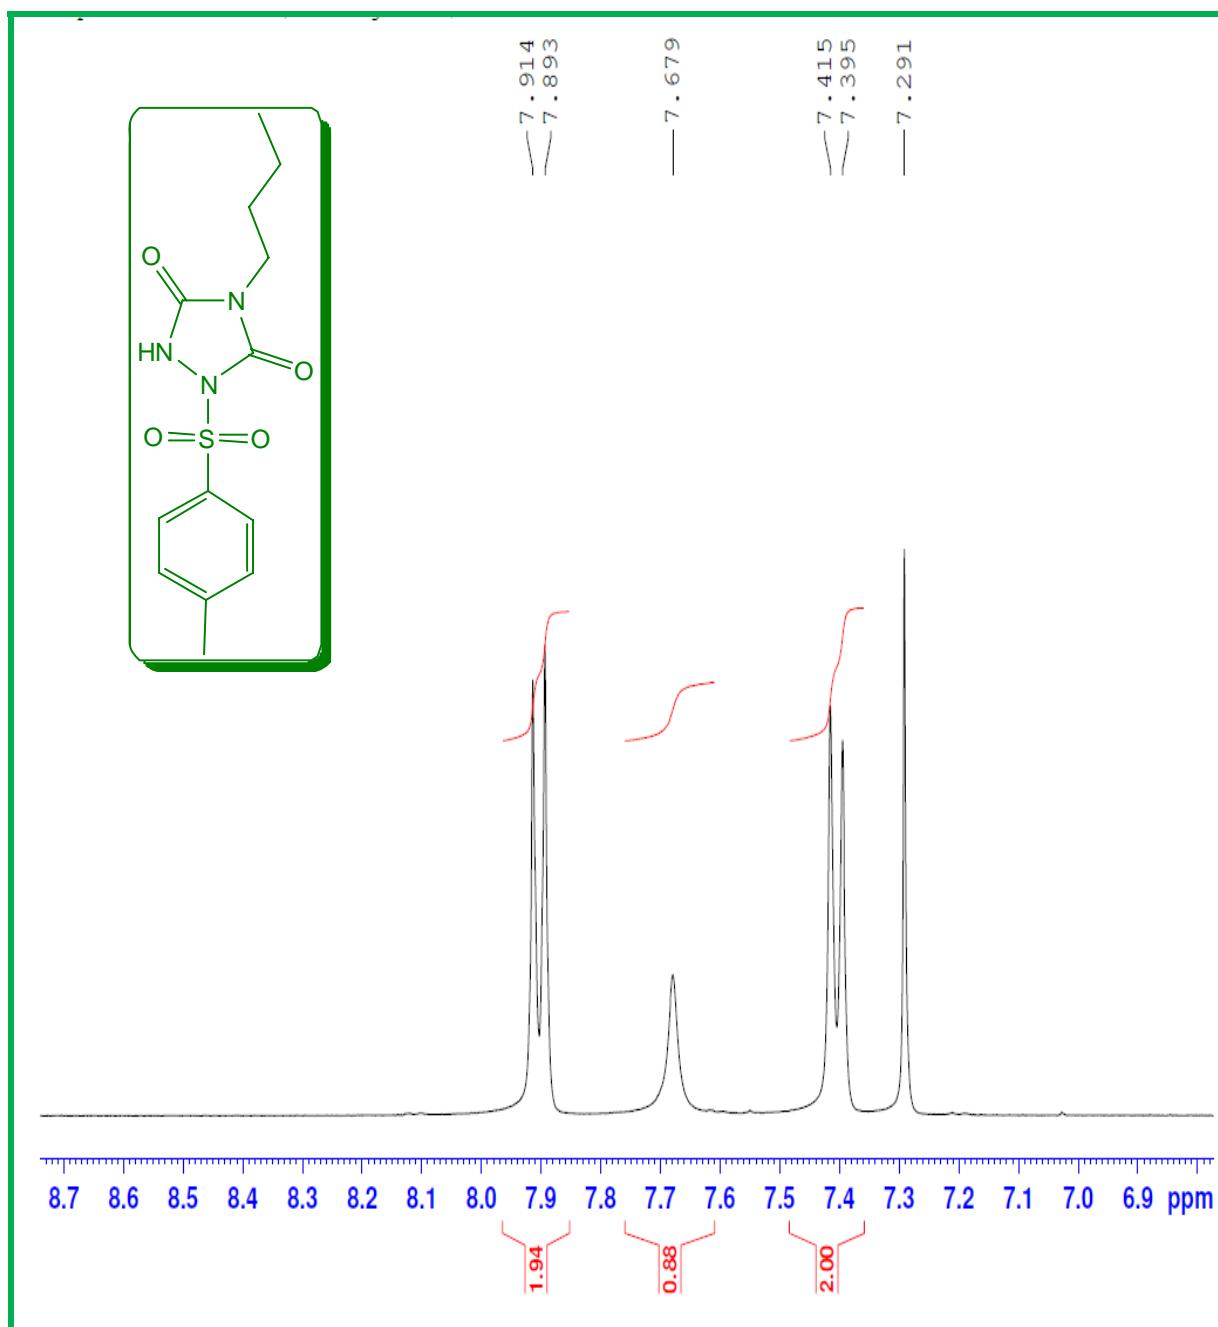

$^{13}\text{C}$  NMR spectrum of **5f**

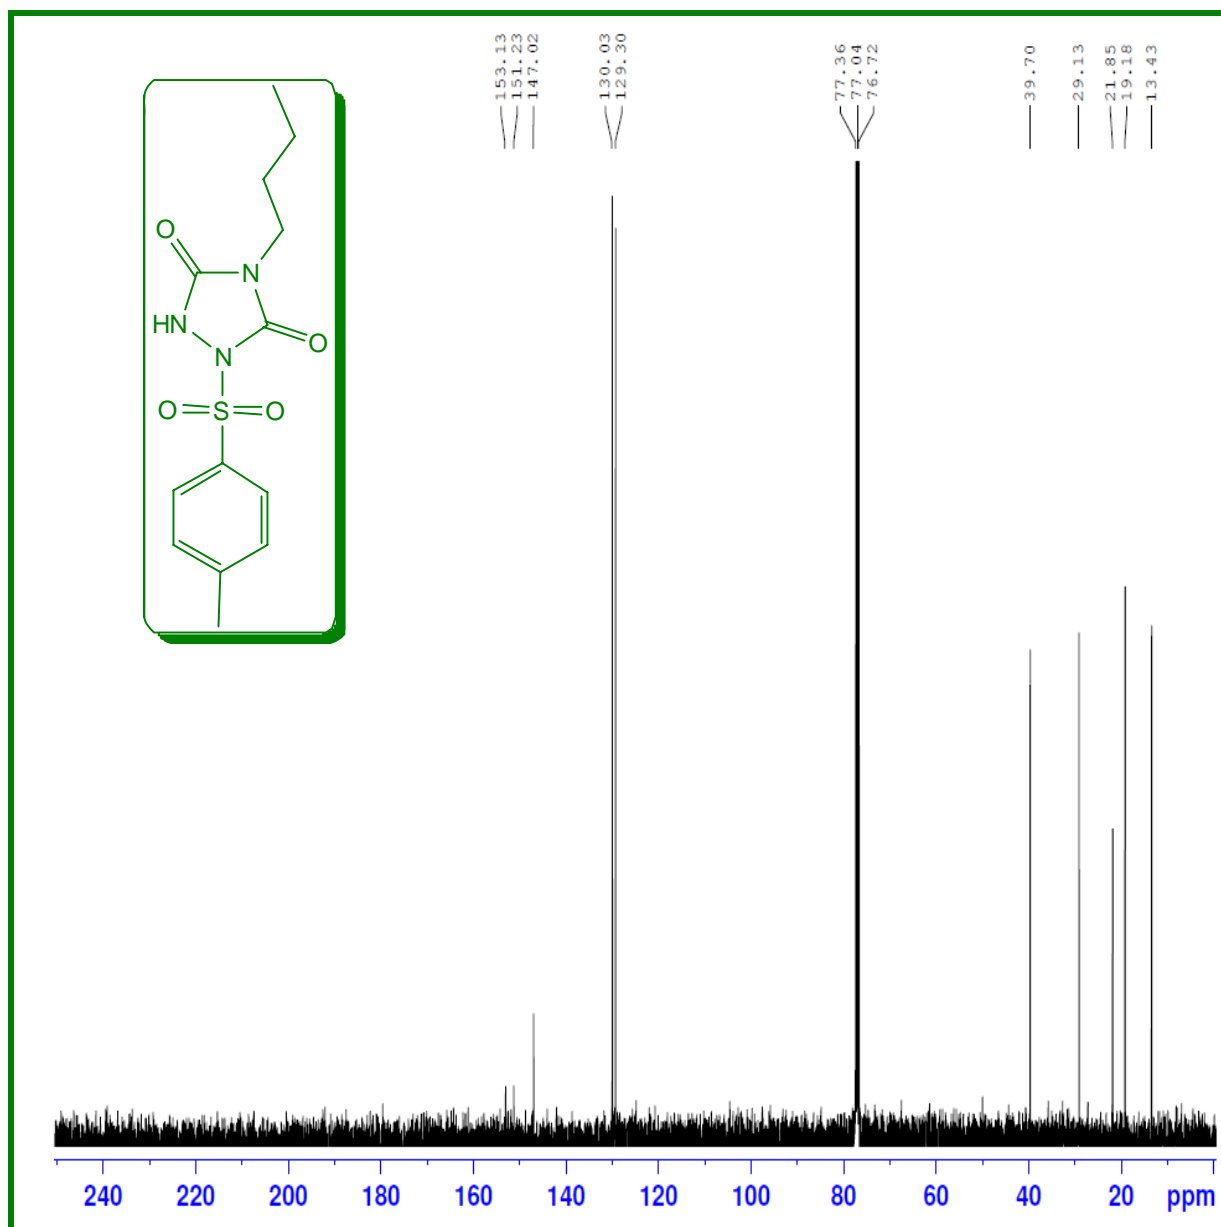

FT-IR spectrum of **5f**

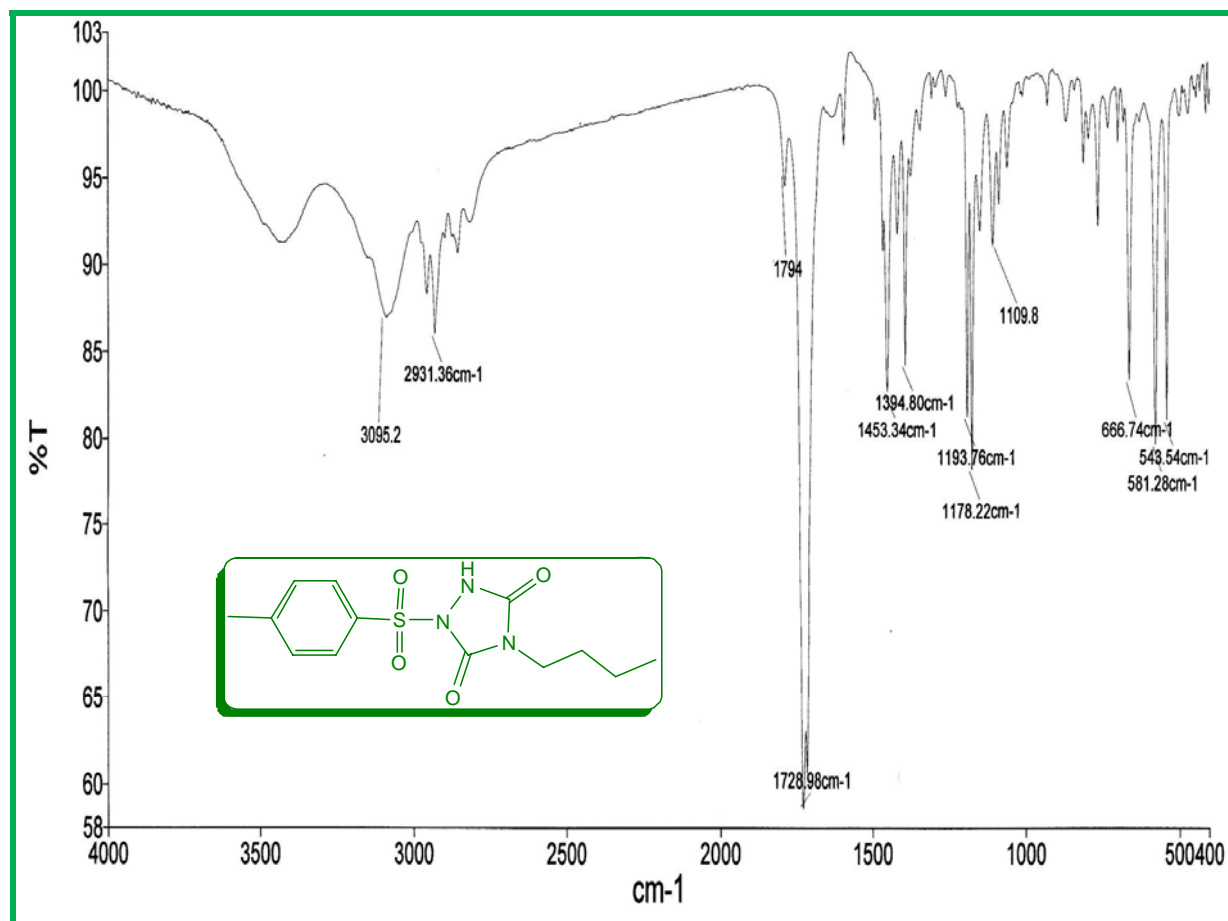

Supplement: c2gc16342j.pdf [file c2gc16342j.pdf]
